# Supplementary material
Source: publisher site journal article supplement (https://static.cambridge.org/content/id/urn:cambridge.org:id:article:S0016756820000898/resource/name/S0016756820000898supp001.pdf)
Supplement: Supplementary file 1 [file S0016756820000898supp001.pdf]

Table S1 LA-ICP-MS zircon U–Pb dating results of investigated samples from the Hengdan Group

| Spot      | Th/U | Isotope ratios                    |            |                                  |            | Ages                             |            |                                   |            |                                  |            |                                  |            | Concordance |
|-----------|------|-----------------------------------|------------|----------------------------------|------------|----------------------------------|------------|-----------------------------------|------------|----------------------------------|------------|----------------------------------|------------|-------------|
|           |      | $^{207}\text{Pb}/^{206}\text{Pb}$ | 1 $\sigma$ | $^{207}\text{Pb}/^{235}\text{U}$ | 1 $\sigma$ | $^{206}\text{Pb}/^{238}\text{U}$ | 1 $\sigma$ | $^{207}\text{Pb}/^{206}\text{Pb}$ | 1 $\sigma$ | $^{207}\text{Pb}/^{235}\text{U}$ | 1 $\sigma$ | $^{206}\text{Pb}/^{238}\text{U}$ | 1 $\sigma$ |             |
| 19BK-36   |      |                                   |            |                                  |            |                                  |            |                                   |            |                                  |            |                                  |            |             |
| NIST610   | 0.99 | 0.90957                           | 0.02725    | 26.37661                         | 0.41365    | 0.21036                          | 0.00331    | 5104                              | 42         | 3361                             | 15         | 1231                             | 18         | 415         |
| 91500     | 0.36 | 0.07547                           | 0.00293    | 1.86647                          | 0.05441    | 0.17939                          | 0.00316    | 1081                              | 76         | 1069                             | 19         | 1064                             | 17         | 102         |
| GJ-1      | 0.06 | 0.06116                           | 0.00211    | 0.84857                          | 0.01959    | 0.10065                          | 0.00164    | 645                               | 73         | 624                              | 11         | 618                              | 10         | 104         |
| 19BK36-01 | 0.92 | 0.06602                           | 0.00246    | 1.25127                          | 0.03379    | 0.13747                          | 0.00233    | 807                               | 76         | 824                              | 15         | 830                              | 13         | 99          |
| 19BK36-02 | 1.72 | 0.06841                           | 0.00254    | 1.2004                           | 0.03209    | 0.12729                          | 0.00215    | 881                               | 75         | 801                              | 15         | 772                              | 12         | 104         |
| 19BK36-03 | 1.24 | 0.06755                           | 0.00270    | 1.3383                           | 0.04093    | 0.14370                          | 0.00251    | 855                               | 81         | 863                              | 18         | 866                              | 14         | 100         |
| 19BK36-04 | 0.93 | 0.06677                           | 0.00342    | 1.1857                           | 0.05209    | 0.12881                          | 0.00256    | 831                               | 103        | 794                              | 24         | 781                              | 15         | 102         |
| 19BK36-05 | 1.11 | 0.06639                           | 0.00275    | 1.1917                           | 0.03842    | 0.13020                          | 0.00229    | 819                               | 84         | 797                              | 18         | 789                              | 13         | 101         |
| 19BK36-06 | 1.11 | 0.06642                           | 0.00229    | 1.1951                           | 0.02768    | 0.13050                          | 0.00215    | 820                               | 71         | 798                              | 13         | 791                              | 12         | 101         |
| 91500     | 0.36 | 0.07311                           | 0.00272    | 1.80641                          | 0.04866    | 0.17921                          | 0.00308    | 1017                              | 74         | 1048                             | 18         | 1063                             | 17         | 99          |
| 19BK36-07 | 0.91 | 0.06619                           | 0.00230    | 1.2500                           | 0.02948    | 0.13699                          | 0.00226    | 812                               | 71         | 823                              | 13         | 828                              | 13         | 99          |
| 19BK36-08 | 0.75 | 0.06464                           | 0.00316    | 1.1442                           | 0.04717    | 0.12838                          | 0.00247    | 763                               | 100        | 775                              | 22         | 779                              | 14         | 99          |
| 19BK36-09 | 1.20 | 0.06822                           | 0.00335    | 1.2365                           | 0.05125    | 0.13146                          | 0.00252    | 875                               | 98         | 817                              | 23         | 796                              | 14         | 103         |
| 19BK36-10 | 0.94 | 0.06589                           | 0.00244    | 1.1967                           | 0.03181    | 0.13173                          | 0.00222    | 803                               | 76         | 799                              | 15         | 798                              | 13         | 100         |
| 19BK36-11 | 1.28 | 0.12417                           | 0.00386    | 6.2712                           | 0.11322    | 0.36632                          | 0.00597    | 2017                              | 54         | 2014                             | 16         | 2012                             | 28         | 100         |
| 19BK36-12 | 1.02 | 0.06823                           | 0.00213    | 1.2897                           | 0.02332    | 0.13710                          | 0.00218    | 876                               | 63         | 841                              | 10         | 828                              | 12         | 102         |
| NIST610   | 0.98 | 0.91111                           | 0.02724    | 25.3355                          | 0.39927    | 0.20169                          | 0.00320    | 5106                              | 42         | 3321                             | 15         | 1184                             | 17         | 431         |
| 91500     | 0.36 | 0.07498                           | 0.00272    | 1.8518                           | 0.04758    | 0.17913                          | 0.00305    | 1068                              | 71         | 1064                             | 17         | 1062                             | 17         | 101         |
| GJ-1      | 0.06 | 0.06179                           | 0.00215    | 0.8503                           | 0.02007    | 0.09980                          | 0.00164    | 667                               | 73         | 625                              | 11         | 613                              | 10         | 102         |
| 19BK36-13 | 1.12 | 0.06468                           | 0.00260    | 1.1074                           | 0.03423    | 0.12418                          | 0.00217    | 764                               | 83         | 757                              | 16         | 755                              | 12         | 100         |
| 19BK36-14 | 1.05 | 0.06542                           | 0.00244    | 1.1961                           | 0.03234    | 0.13260                          | 0.00225    | 788                               | 76         | 799                              | 15         | 803                              | 13         | 100         |
| 19BK36-15 | 1.09 | 0.06583                           | 0.00208    | 1.1861                           | 0.02211    | 0.13067                          | 0.00209    | 801                               | 65         | 794                              | 10         | 792                              | 12         | 100         |
| 19BK36-16 | 2.25 | 0.06460                           | 0.00231    | 1.1413                           | 0.02859    | 0.12813                          | 0.00214    | 761                               | 74         | 773                              | 14         | 777                              | 12         | 99          |
| 19BK36-17 | 0.90 | 0.06749                           | 0.00281    | 1.2863                           | 0.04198    | 0.13824                          | 0.00247    | 853                               | 84         | 840                              | 19         | 835                              | 14         | 101         |
| 19BK36-18 | 0.75 | 0.06800                           | 0.00225    | 1.3264                           | 0.02799    | 0.14147                          | 0.00231    | 869                               | 67         | 857                              | 12         | 853                              | 13         | 101         |
| 91500     | 0.36 | 0.07534                           | 0.00275    | 1.8600                           | 0.04841    | 0.17905                          | 0.00308    | 1078                              | 71         | 1067                             | 17         | 1062                             | 17         | 101         |
| 19BK36-19 | 1.26 | 0.06676                           | 0.00318    | 1.2906                           | 0.05145    | 0.14019                          | 0.00264    | 830                               | 96         | 842                              | 23         | 846                              | 15         | 100         |
| 19BK36-20 | 1.05 | 0.06626                           | 0.00314    | 1.2955                           | 0.05137    | 0.14179                          | 0.00267    | 815                               | 96         | 844                              | 23         | 855                              | 15         | 99          |
| 19BK36-21 | 1.09 | 0.06440                           | 0.00280    | 1.1016                           | 0.03857    | 0.12405                          | 0.00223    | 755                               | 89         | 754                              | 19         | 754                              | 13         | 100         |
| 19BK36-22 | 0.80 | 0.08459                           | 0.00277    | 1.4460                           | 0.02984    | 0.12397                          | 0.00203    | 1306                              | 63         | 908                              | 12         | 753                              | 12         | 173         |

| Spot      | Th/U | Isotope ratios                    |            |                                  |            | Ages                             |            |                                   |            |                                  |            |                                  |            | Concordance |
|-----------|------|-----------------------------------|------------|----------------------------------|------------|----------------------------------|------------|-----------------------------------|------------|----------------------------------|------------|----------------------------------|------------|-------------|
|           |      | $^{207}\text{Pb}/^{206}\text{Pb}$ | 1 $\sigma$ | $^{207}\text{Pb}/^{235}\text{U}$ | 1 $\sigma$ | $^{206}\text{Pb}/^{238}\text{U}$ | 1 $\sigma$ | $^{207}\text{Pb}/^{206}\text{Pb}$ | 1 $\sigma$ | $^{207}\text{Pb}/^{235}\text{U}$ | 1 $\sigma$ | $^{206}\text{Pb}/^{238}\text{U}$ | 1 $\sigma$ |             |
| 19BK36-23 | 0.83 | 0.06271                           | 0.00251    | 1.0998                           | 0.03377    | 0.12718                          | 0.00221    | 699                               | 83         | 753                              | 16         | 772                              | 13         | 98          |
| 19BK36-24 | 0.94 | 0.06800                           | 0.00300    | 1.3471                           | 0.04808    | 0.14366                          | 0.00268    | 869                               | 89         | 866                              | 21         | 865                              | 15         | 100         |
| NIST610   | 0.98 | 0.90182                           | 0.02691    | 25.2364                          | 0.39908    | 0.20294                          | 0.00324    | 5092                              | 42         | 3317                             | 15         | 1191                             | 17         | 427         |
| 91500     | 0.36 | 0.07446                           | 0.00271    | 1.8387                           | 0.04794    | 0.17909                          | 0.00308    | 1054                              | 72         | 1059                             | 17         | 1062                             | 17         | 99          |
| GJ-1      | 0.06 | 0.05793                           | 0.00205    | 0.7622                           | 0.01863    | 0.09541                          | 0.00158    | 527                               | 76         | 575                              | 11         | 588                              | 9          | 98          |
| 19BK36-25 | 1.53 | 0.06358                           | 0.00265    | 1.0347                           | 0.03379    | 0.11801                          | 0.00210    | 728                               | 86         | 721                              | 17         | 719                              | 12         | 100         |
| 19BK36-26 | 0.93 | 0.11100                           | 0.00446    | 5.0758                           | 0.16001    | 0.33163                          | 0.00668    | 1816                              | 71         | 1832                             | 27         | 1846                             | 32         | 98          |
| 19BK36-27 | 1.72 | 0.06527                           | 0.00236    | 1.1558                           | 0.02952    | 0.12841                          | 0.00217    | 783                               | 74         | 780                              | 14         | 779                              | 12         | 100         |
| 19BK36-28 | 0.66 | 0.06705                           | 0.00270    | 1.2402                           | 0.03849    | 0.13413                          | 0.00239    | 839                               | 82         | 819                              | 17         | 811                              | 14         | 101         |
| 19BK36-29 | 0.96 | 0.12701                           | 0.00685    | 2.6536                           | 0.12373    | 0.15151                          | 0.00368    | 2057                              | 92         | 1316                             | 34         | 909                              | 21         | 226         |
| 19BK36-30 | 1.20 | 0.06662                           | 0.00272    | 1.2579                           | 0.03988    | 0.13694                          | 0.00244    | 826                               | 83         | 827                              | 18         | 827                              | 14         | 100         |
| 91500     | 0.36 | 0.07561                           | 0.00282    | 1.8661                           | 0.05079    | 0.17899                          | 0.00312    | 1085                              | 73         | 1069                             | 18         | 1062                             | 17         | 102         |
| 19BK36-31 | 0.63 | 0.06541                           | 0.00222    | 1.18399                          | 0.02660    | 0.13126                          | 0.00217    | 788                               | 70         | 793                              | 12         | 795                              | 12         | 100         |
| 19BK36-32 | 0.66 | 0.06839                           | 0.00248    | 1.3360                           | 0.03461    | 0.14166                          | 0.00241    | 880                               | 73         | 862                              | 15         | 854                              | 14         | 101         |
| 19BK36-33 | 0.77 | 0.06741                           | 0.00247    | 1.2840                           | 0.03392    | 0.13811                          | 0.00236    | 851                               | 74         | 839                              | 15         | 834                              | 13         | 101         |
| 19BK36-34 | 0.86 | 0.06658                           | 0.00216    | 1.2873                           | 0.02630    | 0.14021                          | 0.00229    | 825                               | 66         | 840                              | 12         | 846                              | 13         | 99          |
| 19BK36-35 | 0.91 | 0.06705                           | 0.00263    | 1.3004                           | 0.03880    | 0.14065                          | 0.00247    | 839                               | 80         | 846                              | 17         | 848                              | 14         | 100         |
| 19BK36-36 | 1.10 | 0.06628                           | 0.00465    | 1.1957                           | 0.07720    | 0.13082                          | 0.00318    | 815                               | 140        | 799                              | 36         | 793                              | 18         | 101         |
| NIST610   | 0.99 | 0.89972                           | 0.02678    | 24.9660                          | 0.39596    | 0.20122                          | 0.00323    | 5088                              | 41         | 3307                             | 15         | 1182                             | 17         | 431         |
| 91500     | 0.36 | 0.07778                           | 0.00284    | 1.9201                           | 0.05049    | 0.17902                          | 0.00311    | 1141                              | 71         | 1088                             | 18         | 1062                             | 17         | 107         |
| GJ-1      | 0.06 | 0.05954                           | 0.00209    | 0.7930                           | 0.01921    | 0.09657                          | 0.00161    | 587                               | 74         | 593                              | 11         | 594                              | 9          | 100         |
| 19BK36-37 | 1.01 | 0.06716                           | 0.00340    | 1.2060                           | 0.05234    | 0.13020                          | 0.00256    | 843                               | 102        | 803                              | 24         | 789                              | 15         | 102         |
| 19BK36-38 | 0.89 | 0.06577                           | 0.00489    | 1.1552                           | 0.07974    | 0.12737                          | 0.00317    | 799                               | 149        | 780                              | 38         | 773                              | 18         | 101         |
| 19BK36-39 | 1.97 | 0.06713                           | 0.00290    | 1.0885                           | 0.03771    | 0.11757                          | 0.00217    | 842                               | 87         | 748                              | 18         | 717                              | 13         | 104         |
| 19BK36-40 | 0.82 | 0.06796                           | 0.00226    | 1.2405                           | 0.02680    | 0.13236                          | 0.00218    | 867                               | 67         | 819                              | 12         | 801                              | 12         | 102         |
| 19BK36-41 | 1.45 | 0.12028                           | 0.00389    | 5.888                            | 0.12113    | 0.35500                          | 0.00609    | 1960                              | 57         | 1960                             | 18         | 1958                             | 29         | 100         |
| 19BK36-42 | 1.24 | 0.06744                           | 0.00264    | 1.2456                           | 0.03697    | 0.13392                          | 0.00236    | 852                               | 79         | 821                              | 17         | 810                              | 13         | 101         |
| 91500     | 0.36 | 0.07402                           | 0.00273    | 1.8317                           | 0.04904    | 0.17944                          | 0.00313    | 1042                              | 73         | 1057                             | 18         | 1064                             | 17         | 98          |
| 19BK36-43 | 1.92 | 0.50223                           | 0.01491    | 15.5682                          | 0.24641    | 0.22477                          | 0.00359    | 4248                              | 43         | 2851                             | 15         | 1307                             | 19         | 325         |
| 19BK36-44 | 1.33 | 0.06719                           | 0.00255    | 1.3017                           | 0.03666    | 0.14047                          | 0.00245    | 844                               | 77         | 847                              | 16         | 847                              | 14         | 100         |
| 19BK36-45 | 1.20 | 0.06292                           | 0.00255    | 1.1018                           | 0.03466    | 0.12698                          | 0.00226    | 706                               | 84         | 754                              | 17         | 771                              | 13         | 98          |
| 19BK36-46 | 1.29 | 0.06345                           | 0.00296    | 1.0827                           | 0.04201    | 0.12372                          | 0.00232    | 723                               | 96         | 745                              | 20         | 752                              | 13         | 99          |

| Spot      | Th/U | Isotope ratios                    |            |                                  |            | Ages                             |            |                                   |            | Concordance |                                  |            |                                  |            |
|-----------|------|-----------------------------------|------------|----------------------------------|------------|----------------------------------|------------|-----------------------------------|------------|-------------|----------------------------------|------------|----------------------------------|------------|
|           |      | $^{207}\text{Pb}/^{206}\text{Pb}$ | 1 $\sigma$ | $^{207}\text{Pb}/^{235}\text{U}$ | 1 $\sigma$ | $^{206}\text{Pb}/^{238}\text{U}$ | 1 $\sigma$ | $^{207}\text{Pb}/^{206}\text{Pb}$ | 1 $\sigma$ |             | $^{207}\text{Pb}/^{235}\text{U}$ | 1 $\sigma$ | $^{206}\text{Pb}/^{238}\text{U}$ | 1 $\sigma$ |
| 19BK36-47 | 0.96 | 0.06551                           | 0.00332    | 1.2068                           | 0.05248    | 0.13358                          | 0.00266    | 791                               | 103        | 804         | 24                               | 808        | 15                               | 99         |
| 19BK36-48 | 1.14 | 0.06292                           | 0.00251    | 1.1020                           | 0.03386    | 0.12700                          | 0.00223    | 706                               | 83         | 754         | 16                               | 771        | 13                               | 98         |
| NIST610   | 0.99 | 0.89105                           | 0.02646    | 24.7715                          | 0.39416    | 0.20158                          | 0.00325    | 5075                              | 41         | 3299        | 16                               | 1184       | 17                               | 429        |
| 91500     | 0.36 | 0.07503                           | 0.00268    | 1.8548                           | 0.04700    | 0.17925                          | 0.00309    | 1069                              | 70         | 1065        | 17                               | 1063       | 17                               | 101        |
| GJ-1      | 0.06 | 0.05808                           | 0.00205    | 0.7971                           | 0.01961    | 0.09951                          | 0.00166    | 532                               | 76         | 595         | 11                               | 612        | 10                               | 97         |
| 19BK36-49 | 1.09 | 0.06439                           | 0.00281    | 1.1887                           | 0.04207    | 0.13386                          | 0.00245    | 755                               | 90         | 795         | 20                               | 810        | 14                               | 98         |
| 19BK36-50 | 1.12 | 0.06749                           | 0.00307    | 1.2034                           | 0.04503    | 0.12929                          | 0.00245    | 853                               | 92         | 802         | 21                               | 784        | 14                               | 102        |
| 19BK36-51 | 1.39 | 0.06938                           | 0.00332    | 1.3492                           | 0.05444    | 0.14100                          | 0.00279    | 910                               | 96         | 867         | 24                               | 850        | 16                               | 102        |
| 19BK36-52 | 0.90 | 0.06684                           | 0.00286    | 1.307                            | 0.04479    | 0.14173                          | 0.00262    | 833                               | 87         | 849         | 20                               | 855        | 15                               | 99         |
| 19BK36-53 | 1.79 | 0.06649                           | 0.00272    | 1.2464                           | 0.03996    | 0.13592                          | 0.00244    | 822                               | 83         | 822         | 18                               | 822        | 14                               | 100        |
| 19BK36-54 | 0.97 | 0.06654                           | 0.00312    | 1.1970                           | 0.04687    | 0.13043                          | 0.00251    | 823                               | 95         | 799         | 22                               | 790        | 14                               | 101        |
| 91500     | 0.36 | 0.07505                           | 0.00275    | 1.8547                           | 0.04941    | 0.17918                          | 0.00313    | 1070                              | 72         | 1065        | 18                               | 1063       | 17                               | 101        |
| 19BK36-55 | 1.06 | 0.06560                           | 0.00229    | 1.2380                           | 0.03000    | 0.13684                          | 0.00231    | 794                               | 72         | 818         | 14                               | 827        | 13                               | 99         |
| 19BK36-56 | 1.98 | 0.06541                           | 0.00246    | 1.1420                           | 0.03175    | 0.12659                          | 0.00221    | 788                               | 77         | 774         | 15                               | 768        | 13                               | 101        |
| 19BK36-57 | 0.65 | 0.06550                           | 0.00249    | 1.2374                           | 0.03523    | 0.13697                          | 0.00239    | 791                               | 78         | 818         | 16                               | 828        | 14                               | 99         |
| 19BK36-58 | 1.08 | 0.06397                           | 0.00240    | 1.133                            | 0.03132    | 0.12842                          | 0.00222    | 741                               | 77         | 769         | 15                               | 779        | 13                               | 99         |
| 19BK36-59 | 1.30 | 0.06492                           | 0.00255    | 1.1361                           | 0.03401    | 0.12689                          | 0.00224    | 772                               | 80         | 771         | 16                               | 770        | 13                               | 100        |
| 19BK36-60 | 1.31 | 0.12689                           | 0.00399    | 6.5033                           | 0.12500    | 0.37159                          | 0.00629    | 2055                              | 54         | 2046        | 17                               | 2037       | 30                               | 101        |
| NIST610   | 0.98 | 0.89278                           | 0.02645    | 24.5314                          | 0.39154    | 0.19923                          | 0.00323    | 5078                              | 41         | 3290        | 16                               | 1171       | 17                               | 434        |
| 91500     | 0.36 | 0.07431                           | 0.00270    | 1.8364                           | 0.04815    | 0.17918                          | 0.00313    | 1050                              | 72         | 1059        | 17                               | 1063       | 17                               | 99         |
| GJ-1      | 0.07 | 0.05926                           | 0.00207    | 0.8051                           | 0.01959    | 0.09850                          | 0.00165    | 577                               | 74         | 600         | 11                               | 606        | 10                               | 99         |
| 19BK36-61 | 0.75 | 0.06479                           | 0.00291    | 1.0875                           | 0.04017    | 0.12171                          | 0.00230    | 767                               | 92         | 747         | 20                               | 740        | 13                               | 101        |
| 19BK36-62 | 0.74 | 0.06709                           | 0.00275    | 1.2946                           | 0.04168    | 0.13990                          | 0.00255    | 841                               | 83         | 843         | 18                               | 844        | 14                               | 100        |
| 19BK36-63 | 0.92 | 0.11946                           | 0.00380    | 5.8192                           | 0.11557    | 0.35318                          | 0.00603    | 1948                              | 56         | 1949        | 17                               | 1950       | 29                               | 100        |
| 19BK36-64 | 1.61 | 0.18034                           | 0.00611    | 3.8555                           | 0.08694    | 0.15501                          | 0.00279    | 2656                              | 55         | 1604        | 18                               | 929        | 16                               | 286        |
| 19BK36-65 | 1.54 | 0.06306                           | 0.00260    | 1.1043                           | 0.03583    | 0.12696                          | 0.00228    | 710                               | 85         | 755         | 17                               | 771        | 13                               | 98         |
| 19BK36-66 | 1.36 | 0.06436                           | 0.00512    | 1.0477                           | 0.07795    | 0.11802                          | 0.00314    | 754                               | 160        | 728         | 39                               | 719        | 18                               | 101        |
| 91500     | 0.36 | 0.07523                           | 0.00270    | 1.8569                           | 0.04785    | 0.17897                          | 0.00312    | 1075                              | 71         | 1066        | 17                               | 1061       | 17                               | 101        |
| 19BK36-67 | 1.41 | 0.12517                           | 0.00651    | 2.2983                           | 0.10251    | 0.13313                          | 0.00313    | 2031                              | 89         | 1212        | 32                               | 806        | 18                               | 252        |
| 19BK36-68 | 0.94 | 0.06607                           | 0.00255    | 1.2506                           | 0.03652    | 0.13723                          | 0.00244    | 809                               | 79         | 824         | 16                               | 829        | 14                               | 99         |
| 19BK36-69 | 0.91 | 0.06620                           | 0.00265    | 1.2540                           | 0.03893    | 0.13734                          | 0.00247    | 813                               | 82         | 825         | 18                               | 830        | 14                               | 99         |
| 19BK36-70 | 1.04 | 0.07017                           | 0.00310    | 1.3473                           | 0.04869    | 0.13920                          | 0.00264    | 933                               | 88         | 866         | 21                               | 840        | 15                               | 103        |

| Spot      | Th/U | Isotope ratios                    |            |                                  |            | Ages                             |            |                                   |            |                                  |            |                                  |            | Concordance |
|-----------|------|-----------------------------------|------------|----------------------------------|------------|----------------------------------|------------|-----------------------------------|------------|----------------------------------|------------|----------------------------------|------------|-------------|
|           |      | $^{207}\text{Pb}/^{206}\text{Pb}$ | 1 $\sigma$ | $^{207}\text{Pb}/^{235}\text{U}$ | 1 $\sigma$ | $^{206}\text{Pb}/^{238}\text{U}$ | 1 $\sigma$ | $^{207}\text{Pb}/^{206}\text{Pb}$ | 1 $\sigma$ | $^{207}\text{Pb}/^{235}\text{U}$ | 1 $\sigma$ | $^{206}\text{Pb}/^{238}\text{U}$ | 1 $\sigma$ |             |
| 19BK36-71 | 1.76 | 0.07228                           | 0.00294    | 1.4415                           | 0.04596    | 0.14458                          | 0.00264    | 994                               | 81         | 906                              | 19         | 871                              | 15         | 104         |
| 19BK36-72 | 1.15 | 0.06510                           | 0.00243    | 1.2036                           | 0.03327    | 0.13405                          | 0.00234    | 778                               | 77         | 802                              | 15         | 811                              | 13         | 99          |
| NIST610   | 0.99 | 0.88429                           | 0.02614    | 24.4858                          | 0.39184    | 0.20076                          | 0.00327    | 5064                              | 41         | 3288                             | 16         | 1179                             | 18         | 429         |
| 91500     | 0.36 | 0.07530                           | 0.00277    | 1.8608                           | 0.05021    | 0.17917                          | 0.00317    | 1077                              | 72         | 1067                             | 18         | 1062                             | 17         | 101         |
| GJ-1      | 0.07 | 0.05740                           | 0.00202    | 0.7848                           | 0.01944    | 0.09912                          | 0.00167    | 507                               | 76         | 588                              | 11         | 609                              | 10         | 97          |
| 19BK36-73 | 1.46 | 0.06328                           | 0.00407    | 1.0528                           | 0.06150    | 0.12063                          | 0.00278    | 718                               | 131        | 730                              | 30         | 734                              | 16         | 99          |
| 19BK36-74 | 0.29 | 0.09095                           | 0.00329    | 1.9479                           | 0.05066    | 0.15529                          | 0.00275    | 1445                              | 67         | 1098                             | 17         | 931                              | 15         | 155         |
| 19BK36-75 | 1.13 | 0.06471                           | 0.00300    | 1.0465                           | 0.04039    | 0.11725                          | 0.00225    | 765                               | 95         | 727                              | 20         | 715                              | 13         | 102         |
| 19BK36-76 | 1.41 | 0.06625                           | 0.00335    | 1.2539                           | 0.05468    | 0.13723                          | 0.00273    | 814                               | 102        | 825                              | 25         | 829                              | 15         | 100         |
| 19BK36-77 | 1.51 | 0.06577                           | 0.00293    | 1.2442                           | 0.04560    | 0.13717                          | 0.00258    | 799                               | 91         | 821                              | 21         | 829                              | 15         | 99          |
| 19BK36-78 | 0.72 | 0.10663                           | 0.00397    | 2.1448                           | 0.05866    | 0.14583                          | 0.00267    | 1743                              | 67         | 1163                             | 19         | 878                              | 15         | 199         |
| 91500     | 0.36 | 0.07363                           | 0.00266    | 1.8171                           | 0.04755    | 0.17894                          | 0.00314    | 1031                              | 71         | 1052                             | 17         | 1061                             | 17         | 97          |
| 19BK36-79 | 1.29 | 0.06492                           | 0.00352    | 1.1300                           | 0.05364    | 0.12620                          | 0.00266    | 772                               | 110        | 768                              | 26         | 766                              | 15         | 100         |
| 19BK36-80 | 0.89 | 0.06329                           | 0.00266    | 1.1720                           | 0.03939    | 0.13426                          | 0.00244    | 718                               | 87         | 788                              | 18         | 812                              | 14         | 97          |
| 19BK36-81 | 0.70 | 0.06426                           | 0.00236    | 1.2559                           | 0.03373    | 0.14170                          | 0.00247    | 750                               | 76         | 826                              | 15         | 854                              | 14         | 97          |
| 19BK36-82 | 1.14 | 0.06386                           | 0.00254    | 1.152                            | 0.03547    | 0.13075                          | 0.00235    | 737                               | 82         | 778                              | 17         | 792                              | 13         | 98          |
| 19BK36-83 | 0.77 | 0.06338                           | 0.00216    | 1.2553                           | 0.02928    | 0.14360                          | 0.00243    | 721                               | 71         | 826                              | 13         | 865                              | 14         | 95          |
| 19BK36-84 | 0.94 | 0.06726                           | 0.00283    | 1.241                            | 0.04181    | 0.13382                          | 0.00247    | 846                               | 85         | 820                              | 19         | 810                              | 14         | 101         |
| NIST610   | 0.99 | 0.88864                           | 0.02621    | 24.645                           | 0.39565    | 0.20108                          | 0.00329    | 5071                              | 41         | 3294                             | 16         | 1181                             | 18         | 429         |
| 91500     | 0.37 | 0.07534                           | 0.00274    | 1.864                            | 0.04930    | 0.17942                          | 0.00317    | 1078                              | 71         | 1069                             | 17         | 1064                             | 17         | 101         |
| GJ-1      | 0.07 | 0.05814                           | 0.00204    | 0.803                            | 0.01979    | 0.10017                          | 0.00170    | 535                               | 76         | 599                              | 11         | 615                              | 10         | 97          |
| 19BK36-85 | 1.55 | 0.06543                           | 0.00554    | 1.33568                          | 0.10674    | 0.14801                          | 0.00420    | 788                               | 168        | 861                              | 46         | 890                              | 24         | 97          |
| 19BK36-86 | 0.95 | 0.06722                           | 0.00478    | 1.30725                          | 0.08597    | 0.14100                          | 0.00352    | 845                               | 141        | 849                              | 38         | 850                              | 20         | 100         |
| 19BK36-87 | 1.95 | 0.06285                           | 0.00256    | 1.10114                          | 0.03528    | 0.12704                          | 0.00231    | 703                               | 84         | 754                              | 17         | 771                              | 13         | 98          |
| 19BK36-88 | 0.58 | 0.06318                           | 0.00280    | 1.13916                          | 0.04147    | 0.13073                          | 0.00245    | 714                               | 91         | 772                              | 20         | 792                              | 14         | 97          |
| 19BK36-89 | 1.11 | 0.06316                           | 0.00284    | 1.14325                          | 0.04237    | 0.13124                          | 0.00250    | 714                               | 93         | 774                              | 20         | 795                              | 14         | 97          |
| 19BK36-90 | 1.26 | 0.06462                           | 0.00343    | 1.14008                          | 0.05298    | 0.12793                          | 0.00258    | 762                               | 108        | 773                              | 25         | 776                              | 15         | 100         |
| NIST610   | 0.98 | 0.88166                           | 0.02597    | 24.61795                         | 0.39611    | 0.20245                          | 0.00333    | 5060                              | 41         | 3293                             | 16         | 1189                             | 18         | 426         |
| 91500     | 0.37 | 0.07463                           | 0.00269    | 1.84569                          | 0.04824    | 0.17931                          | 0.00317    | 1058                              | 71         | 1062                             | 17         | 1063                             | 17         | 100         |
| GJ-1      | 0.07 | 0.05818                           | 0.00205    | 0.79790                          | 0.01985    | 0.09944                          | 0.00169    | 536                               | 76         | 596                              | 11         | 611                              | 10         | 97          |

| Spot       | Th/U | Isotope ratios                    |            |                                  |            | Ages                             |            |                                   |            |                                  |            |                                  |            | Concordance |
|------------|------|-----------------------------------|------------|----------------------------------|------------|----------------------------------|------------|-----------------------------------|------------|----------------------------------|------------|----------------------------------|------------|-------------|
|            |      | $^{207}\text{Pb}/^{206}\text{Pb}$ | 1 $\sigma$ | $^{207}\text{Pb}/^{235}\text{U}$ | 1 $\sigma$ | $^{206}\text{Pb}/^{238}\text{U}$ | 1 $\sigma$ | $^{207}\text{Pb}/^{206}\text{Pb}$ | 1 $\sigma$ | $^{207}\text{Pb}/^{235}\text{U}$ | 1 $\sigma$ | $^{206}\text{Pb}/^{238}\text{U}$ | 1 $\sigma$ |             |
| 19BK-37    |      |                                   |            |                                  |            |                                  |            |                                   |            |                                  |            |                                  |            |             |
| NIST610    | 0.98 | 0.90736                           | 0.02750    | 24.96029                         | 0.40661    | 0.19945                          | 0.00323    | 5100                              | 42         | 3307                             | 16         | 1172                             | 17         | 435         |
| 91500      | 0.37 | 0.07728                           | 0.00286    | 1.91040                          | 0.05072    | 0.17923                          | 0.00314    | 1129                              | 72         | 1085                             | 18         | 1063                             | 17         | 106         |
| GJ-1       | 0.07 | 0.05989                           | 0.00215    | 0.80898                          | 0.02023    | 0.09793                          | 0.00164    | 600                               | 76         | 602                              | 11         | 602                              | 10         | 100         |
| 19BK-37-01 | 1.40 | 0.06607                           | 0.00303    | 1.1337                           | 0.04262    | 0.12442                          | 0.00236    | 808                               | 93         | 770                              | 20         | 756                              | 14         | 102         |
| 19BK-37-02 | 1.16 | 0.06685                           | 0.00317    | 1.2092                           | 0.04779    | 0.13115                          | 0.00251    | 833                               | 96         | 805                              | 22         | 794                              | 14         | 101         |
| 19BK-37-03 | 0.81 | 0.06654                           | 0.00254    | 1.2337                           | 0.03469    | 0.13443                          | 0.00234    | 824                               | 78         | 816                              | 16         | 813                              | 13         | 100         |
| 19BK-37-04 | 1.28 | 0.06488                           | 0.00280    | 1.1554                           | 0.03986    | 0.12913                          | 0.00236    | 770                               | 88         | 780                              | 19         | 783                              | 13         | 100         |
| 19BK-37-05 | 0.73 | 0.06452                           | 0.00241    | 1.1492                           | 0.03099    | 0.12915                          | 0.00222    | 759                               | 77         | 777                              | 15         | 783                              | 13         | 99          |
| 19BK-37-06 | 0.94 | 0.06573                           | 0.00256    | 1.1719                           | 0.03414    | 0.12927                          | 0.00226    | 798                               | 80         | 788                              | 16         | 784                              | 13         | 100         |
| 91500      | 0.36 | 0.07290                           | 0.00276    | 1.8019                           | 0.05009    | 0.17922                          | 0.00316    | 1011                              | 75         | 1046                             | 18         | 1063                             | 17         | 95          |
| 19BK-37-07 | 0.65 | 0.06801                           | 0.00248    | 1.3792                           | 0.03552    | 0.14704                          | 0.00252    | 869                               | 74         | 880                              | 15         | 884                              | 14         | 100         |
| 19BK-37-08 | 0.91 | 0.06852                           | 0.00247    | 1.3554                           | 0.03418    | 0.14342                          | 0.00245    | 884                               | 73         | 870                              | 15         | 864                              | 14         | 101         |
| 19BK-37-09 | 0.29 | 0.10683                           | 0.00332    | 2.8380                           | 0.05012    | 0.19263                          | 0.00313    | 1746                              | 56         | 1366                             | 13         | 1136                             | 17         | 154         |
| 19BK-37-10 | 1.11 | 0.06579                           | 0.00292    | 1.1720                           | 0.04209    | 0.12916                          | 0.00240    | 800                               | 90         | 788                              | 20         | 783                              | 14         | 101         |
| 19BK-37-11 | 0.97 | 0.06554                           | 0.00291    | 1.1541                           | 0.04142    | 0.12767                          | 0.00237    | 792                               | 90         | 779                              | 20         | 775                              | 14         | 101         |
| 19BK-37-12 | 1.42 | 0.06560                           | 0.00257    | 1.1539                           | 0.03389    | 0.12753                          | 0.00225    | 794                               | 80         | 779                              | 16         | 774                              | 13         | 101         |
| NIST610    | 0.99 | 0.91588                           | 0.02776    | 25.1116                          | 0.41026    | 0.19880                          | 0.00323    | 5114                              | 42         | 3313                             | 16         | 1169                             | 17         | 437         |
| 91500      | 0.36 | 0.07731                           | 0.00301    | 1.9090                           | 0.05575    | 0.17904                          | 0.00321    | 1129                              | 76         | 1084                             | 19         | 1062                             | 18         | 106         |
| GJ-1       | 0.07 | 0.06000                           | 0.00217    | 0.8233                           | 0.02083    | 0.09949                          | 0.00168    | 604                               | 76         | 610                              | 12         | 611                              | 10         | 100         |
| 19BK-37-13 | 0.75 | 0.06652                           | 0.00238    | 1.1873                           | 0.02950    | 0.12941                          | 0.00220    | 823                               | 73         | 795                              | 14         | 785                              | 13         | 101         |
| 19BK-37-14 | 1.27 | 0.06426                           | 0.00199    | 1.0502                           | 0.01842    | 0.11848                          | 0.00191    | 750                               | 64         | 729                              | 9          | 722                              | 11         | 100         |
| 19BK-37-15 | 1.78 | 0.06547                           | 0.00209    | 1.1269                           | 0.02153    | 0.12481                          | 0.00203    | 789                               | 66         | 766                              | 10         | 758                              | 12         | 101         |
| 19BK-37-16 | 0.80 | 0.06806                           | 0.00227    | 1.3180                           | 0.02812    | 0.14041                          | 0.00233    | 870                               | 68         | 854                              | 12         | 847                              | 13         | 101         |
| 19BK-37-17 | 1.60 | 0.06454                           | 0.00413    | 1.0929                           | 0.06337    | 0.12279                          | 0.00276    | 759                               | 130        | 750                              | 31         | 747                              | 16         | 100         |
| 19BK-37-18 | 0.80 | 0.06876                           | 0.00306    | 1.2096                           | 0.04352    | 0.12754                          | 0.00240    | 892                               | 89         | 805                              | 20         | 774                              | 14         | 104         |
| 91500      | 0.36 | 0.07249                           | 0.00269    | 1.7890                           | 0.04793    | 0.17895                          | 0.00313    | 1000                              | 74         | 1042                             | 17         | 1061                             | 17         | 94          |
| 19BK-37-19 | 1.02 | 0.06688                           | 0.00228    | 1.2776                           | 0.02881    | 0.13850                          | 0.00232    | 834                               | 70         | 836                              | 13         | 836                              | 13         | 100         |
| 19BK-37-20 | 0.77 | 0.06888                           | 0.00282    | 1.3218                           | 0.04193    | 0.13914                          | 0.00251    | 895                               | 82         | 855                              | 18         | 840                              | 14         | 102         |
| 19BK-37-21 | 0.87 | 0.06389                           | 0.00311    | 1.1519                           | 0.04725    | 0.13072                          | 0.00251    | 738                               | 100        | 778                              | 22         | 792                              | 14         | 98          |
| 19BK-37-22 | 1.05 | 0.06572                           | 0.00469    | 1.2102                           | 0.07953    | 0.13351                          | 0.00330    | 798                               | 143        | 805                              | 37         | 808                              | 19         | 100         |
| 19BK-37-23 | 1.04 | 0.06493                           | 0.00350    | 1.1476                           | 0.05392    | 0.12816                          | 0.00258    | 772                               | 110        | 776                              | 25         | 777                              | 15         | 100         |

| Spot       | Th/U | Isotope ratios                    |            |                                  |            | Ages                             |            |                                   |            |                                  |            |                                  |            | Concordance |
|------------|------|-----------------------------------|------------|----------------------------------|------------|----------------------------------|------------|-----------------------------------|------------|----------------------------------|------------|----------------------------------|------------|-------------|
|            |      | $^{207}\text{Pb}/^{206}\text{Pb}$ | 1 $\sigma$ | $^{207}\text{Pb}/^{235}\text{U}$ | 1 $\sigma$ | $^{206}\text{Pb}/^{238}\text{U}$ | 1 $\sigma$ | $^{207}\text{Pb}/^{206}\text{Pb}$ | 1 $\sigma$ | $^{207}\text{Pb}/^{235}\text{U}$ | 1 $\sigma$ | $^{206}\text{Pb}/^{238}\text{U}$ | 1 $\sigma$ |             |
| 19BK-37-24 | 1.60 | 0.06693                           | 0.00257    | 1.1474                           | 0.03253    | 0.12431                          | 0.00218    | 836                               | 78         | 776                              | 15         | 755                              | 12         | 103         |
| NIST610    | 0.99 | 0.90919                           | 0.02756    | 24.8083                          | 0.40640    | 0.19785                          | 0.00322    | 5103                              | 42         | 3301                             | 16         | 1164                             | 17         | 438         |
| 91500      | 0.37 | 0.07700                           | 0.00290    | 1.9036                           | 0.05250    | 0.17927                          | 0.00318    | 1121                              | 73         | 1082                             | 18         | 1063                             | 17         | 105         |
| GJ-1       | 0.07 | 0.06007                           | 0.00218    | 0.7917                           | 0.02017    | 0.09556                          | 0.00162    | 606                               | 76         | 592                              | 11         | 588                              | 10         | 101         |
| 19BK-37-25 | 1.21 | 0.06292                           | 0.00257    | 1.1098                           | 0.03512    | 0.12789                          | 0.00227    | 706                               | 85         | 758                              | 17         | 776                              | 13         | 98          |
| 19BK-37-26 | 0.80 | 0.06318                           | 0.00249    | 1.0924                           | 0.03256    | 0.12536                          | 0.00220    | 714                               | 82         | 750                              | 16         | 761                              | 13         | 98          |
| 19BK-37-27 | 1.44 | 0.06674                           | 0.00252    | 1.1749                           | 0.03244    | 0.12765                          | 0.00222    | 830                               | 77         | 789                              | 15         | 774                              | 13         | 102         |
| 19BK-37-28 | 1.55 | 0.06447                           | 0.00255    | 1.1322                           | 0.03383    | 0.12734                          | 0.00225    | 757                               | 81         | 769                              | 16         | 773                              | 13         | 99          |
| 19BK-37-29 | 1.41 | 0.07396                           | 0.00352    | 1.3178                           | 0.05217    | 0.12919                          | 0.00256    | 1040                              | 93         | 854                              | 23         | 783                              | 15         | 133         |
| 19BK-37-30 | 1.17 | 0.06604                           | 0.00303    | 1.1145                           | 0.04194    | 0.12237                          | 0.00231    | 808                               | 93         | 760                              | 20         | 744                              | 13         | 102         |
| 91500      | 0.35 | 0.07437                           | 0.00272    | 1.8377                           | 0.04803    | 0.17919                          | 0.00313    | 1051                              | 72         | 1059                             | 17         | 1063                             | 17         | 99          |
| 19BK-37-31 | 1.02 | 0.06618                           | 0.00363    | 1.20773                          | 0.05790    | 0.13233                          | 0.00272    | 812                               | 111        | 804                              | 27         | 801                              | 16         | 100         |
| 19BK-37-32 | 1.30 | 0.06633                           | 0.00327    | 1.1941                           | 0.04973    | 0.13053                          | 0.00255    | 817                               | 100        | 798                              | 23         | 791                              | 15         | 101         |
| 19BK-37-33 | 0.95 | 0.06608                           | 0.00264    | 1.1530                           | 0.03519    | 0.12653                          | 0.00225    | 809                               | 82         | 779                              | 17         | 768                              | 13         | 101         |
| 19BK-37-34 | 1.21 | 0.15187                           | 0.00542    | 2.5508                           | 0.06252    | 0.12179                          | 0.00219    | 2367                              | 60         | 1287                             | 18         | 741                              | 13         | 319         |
| 19BK-37-35 | 0.67 | 0.06582                           | 0.00388    | 1.1890                           | 0.06230    | 0.13098                          | 0.00286    | 801                               | 119        | 796                              | 29         | 794                              | 16         | 100         |
| 19BK-37-36 | 1.37 | 0.06621                           | 0.00320    | 1.1304                           | 0.04584    | 0.12379                          | 0.00240    | 813                               | 98         | 768                              | 22         | 752                              | 14         | 102         |
| NIST610    | 0.99 | 0.90563                           | 0.02745    | 24.7580                          | 0.40666    | 0.19823                          | 0.00324    | 5098                              | 42         | 3299                             | 16         | 1166                             | 17         | 437         |
| 91500      | 0.36 | 0.07344                           | 0.00298    | 1.8138                           | 0.05677    | 0.17910                          | 0.00329    | 1026                              | 80         | 1051                             | 20         | 1062                             | 18         | 97          |
| GJ-1       | 0.07 | 0.05920                           | 0.00215    | 0.7982                           | 0.02055    | 0.09777                          | 0.00166    | 574                               | 77         | 596                              | 12         | 601                              | 10         | 99          |
| 19BK-37-37 | 1.61 | 0.06385                           | 0.00227    | 1.1060                           | 0.02730    | 0.12560                          | 0.00213    | 737                               | 74         | 756                              | 13         | 763                              | 12         | 99          |
| 19BK-37-38 | 1.03 | 0.06510                           | 0.00295    | 1.1665                           | 0.04315    | 0.12993                          | 0.00244    | 778                               | 92         | 785                              | 20         | 787                              | 14         | 100         |
| 19BK-37-39 | 0.85 | 0.06434                           | 0.00231    | 1.1317                           | 0.02850    | 0.12754                          | 0.00218    | 753                               | 74         | 769                              | 14         | 774                              | 12         | 99          |
| 19BK-37-40 | 0.99 | 0.07339                           | 0.00262    | 1.6908                           | 0.04207    | 0.16706                          | 0.00288    | 1025                              | 71         | 1005                             | 16         | 996                              | 16         | 103         |
| 19BK-37-41 | 1.48 | 0.06360                           | 0.00227    | 1.119                            | 0.02775    | 0.12757                          | 0.00217    | 728                               | 74         | 762                              | 13         | 774                              | 12         | 99          |
| 19BK-37-42 | 1.25 | 0.06522                           | 0.00359    | 1.2134                           | 0.05852    | 0.13491                          | 0.00282    | 781                               | 112        | 807                              | 27         | 816                              | 16         | 99          |
| 91500      | 0.36 | 0.07534                           | 0.00293    | 1.8589                           | 0.05441    | 0.17891                          | 0.00323    | 1078                              | 76         | 1067                             | 19         | 1061                             | 18         | 102         |
| 19BK-37-43 | 0.80 | 0.06433                           | 0.00230    | 1.1499                           | 0.02856    | 0.12962                          | 0.00221    | 752                               | 74         | 777                              | 13         | 786                              | 13         | 99          |
| 19BK-37-44 | 1.52 | 0.07806                           | 0.00263    | 1.2941                           | 0.02837    | 0.12022                          | 0.00202    | 1148                              | 66         | 843                              | 13         | 732                              | 12         | 157         |
| 19BK-37-45 | 1.33 | 0.06733                           | 0.00243    | 1.2314                           | 0.03116    | 0.13262                          | 0.00228    | 848                               | 73         | 815                              | 14         | 803                              | 13         | 102         |
| 19BK-37-46 | 0.75 | 0.06548                           | 0.00275    | 1.1885                           | 0.03929    | 0.13162                          | 0.00239    | 790                               | 86         | 795                              | 18         | 797                              | 14         | 100         |
| 19BK-37-47 | 1.54 | 0.06562                           | 0.00215    | 1.0702                           | 0.02209    | 0.11826                          | 0.00196    | 794                               | 67         | 739                              | 11         | 721                              | 11         | 102         |

| Spot       | Th/U | Isotope ratios                       |         |                                     |         | Ages                                |         |                                      |     |                                     |    |                                     |    | Concordance |
|------------|------|--------------------------------------|---------|-------------------------------------|---------|-------------------------------------|---------|--------------------------------------|-----|-------------------------------------|----|-------------------------------------|----|-------------|
|            |      | <sup>207</sup> Pb/ <sup>206</sup> Pb | 1σ      | <sup>207</sup> Pb/ <sup>235</sup> U | 1σ      | <sup>206</sup> Pb/ <sup>238</sup> U | 1σ      | <sup>207</sup> Pb/ <sup>206</sup> Pb | 1σ  | <sup>207</sup> Pb/ <sup>235</sup> U | 1σ | <sup>206</sup> Pb/ <sup>238</sup> U | 1σ |             |
| 19BK-37-48 | 1.26 | 0.06674                              | 0.00344 | 1.2270                              | 0.05434 | 0.13331                             | 0.00272 | 830                                  | 104 | 813                                 | 25 | 807                                 | 16 | 101         |
| NIST610    | 0.99 | 0.89830                              | 0.02723 | 24.6214                             | 0.40570 | 0.19875                             | 0.00325 | 5086                                 | 42  | 3293                                | 16 | 1169                                | 18 | 435         |
| 91500      | 0.37 | 0.07314                              | 0.00275 | 1.8111                              | 0.04988 | 0.17957                             | 0.00317 | 1018                                 | 74  | 1050                                | 18 | 1065                                | 17 | 96          |
| GJ-1       | 0.07 | 0.06010                              | 0.00217 | 0.8192                              | 0.02087 | 0.09883                             | 0.00168 | 607                                  | 76  | 608                                 | 12 | 608                                 | 10 | 100         |
| 19BK-37-49 | 0.93 | 0.06549                              | 0.00247 | 1.1677                              | 0.03215 | 0.12929                             | 0.00225 | 790                                  | 77  | 786                                 | 15 | 784                                 | 13 | 100         |
| 19BK-37-50 | 1.09 | 0.06560                              | 0.00290 | 1.1558                              | 0.04124 | 0.12775                             | 0.00237 | 794                                  | 90  | 780                                 | 19 | 775                                 | 14 | 101         |
| 19BK-37-51 | 2.14 | 0.06515                              | 0.00244 | 1.1049                              | 0.02999 | 0.12297                             | 0.00213 | 779                                  | 77  | 756                                 | 14 | 748                                 | 12 | 101         |
| 19BK-37-52 | 0.57 | 0.06403                              | 0.00261 | 1.169                               | 0.03696 | 0.13234                             | 0.00237 | 743                                  | 84  | 786                                 | 17 | 801                                 | 14 | 98          |
| 19BK-37-53 | 0.31 | 0.10674                              | 0.00492 | 2.1587                              | 0.08163 | 0.14665                             | 0.00307 | 1744                                 | 82  | 1168                                | 26 | 882                                 | 17 | 198         |
| 19BK-37-54 | 0.34 | 0.10974                              | 0.00344 | 4.9040                              | 0.09049 | 0.32405                             | 0.00539 | 1795                                 | 56  | 1803                                | 16 | 1810                                | 26 | 100         |
| 91500      | 0.37 | 0.07820                              | 0.00290 | 1.9345                              | 0.05179 | 0.17938                             | 0.00317 | 1152                                 | 72  | 1093                                | 18 | 1064                                | 17 | 108         |
| 19BK-37-55 | 0.88 | 0.06470                              | 0.00251 | 1.1887                              | 0.03460 | 0.13324                             | 0.00235 | 765                                  | 80  | 795                                 | 16 | 806                                 | 13 | 99          |
| 19BK-37-56 | 1.20 | 0.06589                              | 0.00252 | 1.0717                              | 0.03034 | 0.11795                             | 0.00206 | 803                                  | 78  | 740                                 | 15 | 719                                 | 12 | 103         |
| 19BK-37-57 | 1.65 | 0.06547                              | 0.00232 | 1.1743                              | 0.02866 | 0.13006                             | 0.00222 | 790                                  | 73  | 789                                 | 13 | 788                                 | 13 | 100         |
| 19BK-37-58 | 1.71 | 0.06413                              | 0.00243 | 1.091                               | 0.03043 | 0.12341                             | 0.00215 | 746                                  | 78  | 749                                 | 15 | 750                                 | 12 | 100         |
| 19BK-37-59 | 1.29 | 0.07593                              | 0.00446 | 1.4160                              | 0.07382 | 0.13524                             | 0.00307 | 1093                                 | 113 | 896                                 | 31 | 818                                 | 17 | 134         |
| 19BK-37-60 | 1.46 | 0.06549                              | 0.00254 | 1.1779                              | 0.03415 | 0.13043                             | 0.00231 | 790                                  | 79  | 790                                 | 16 | 790                                 | 13 | 100         |
| NIST610    | 0.98 | 0.90544                              | 0.02745 | 24.8018                             | 0.40974 | 0.19863                             | 0.00326 | 5097                                 | 42  | 3300                                | 16 | 1168                                | 18 | 436         |
| 91500      | 0.36 | 0.07566                              | 0.00289 | 1.8685                              | 0.05291 | 0.17907                             | 0.00321 | 1086                                 | 75  | 1070                                | 19 | 1062                                | 18 | 102         |
| GJ-1       | 0.07 | 0.06089                              | 0.00219 | 0.8134                              | 0.02058 | 0.09688                             | 0.00165 | 635                                  | 76  | 604                                 | 12 | 596                                 | 10 | 101         |
| 19BK-37-61 | 1.28 | 0.06591                              | 0.00307 | 1.2214                              | 0.04718 | 0.13437                             | 0.00258 | 804                                  | 95  | 810                                 | 22 | 813                                 | 15 | 100         |
| 19BK-37-62 | 0.80 | 0.06859                              | 0.00318 | 1.4422                              | 0.05532 | 0.15247                             | 0.00294 | 887                                  | 93  | 907                                 | 23 | 915                                 | 16 | 99          |
| 19BK-37-63 | 1.41 | 0.06856                              | 0.00263 | 1.1889                              | 0.03389 | 0.12576                             | 0.00222 | 886                                  | 77  | 796                                 | 16 | 764                                 | 13 | 104         |
| 19BK-37-64 | 0.70 | 0.06561                              | 0.00221 | 1.2952                              | 0.02849 | 0.14315                             | 0.00240 | 794                                  | 69  | 844                                 | 13 | 863                                 | 14 | 98          |
| 19BK-37-65 | 1.25 | 0.06481                              | 0.00261 | 1.1755                              | 0.03625 | 0.13152                             | 0.00236 | 768                                  | 82  | 789                                 | 17 | 797                                 | 13 | 99          |
| 19BK-37-66 | 1.61 | 0.06509                              | 0.00311 | 1.1144                              | 0.04442 | 0.12414                             | 0.00241 | 777                                  | 97  | 760                                 | 21 | 754                                 | 14 | 101         |
| 91500      | 0.37 | 0.07244                              | 0.00278 | 1.7891                              | 0.05125 | 0.17910                             | 0.00322 | 998                                  | 76  | 1042                                | 19 | 1062                                | 18 | 94          |
| 19BK-37-67 | 0.94 | 0.06537                              | 0.00278 | 1.1334                              | 0.03827 | 0.12573                             | 0.00230 | 786                                  | 87  | 769                                 | 18 | 764                                 | 13 | 101         |
| 19BK-37-68 | 1.95 | 0.06415                              | 0.00211 | 1.0519                              | 0.02186 | 0.11891                             | 0.00197 | 747                                  | 68  | 730                                 | 11 | 724                                 | 11 | 100         |
| 19BK-37-69 | 0.61 | 0.06712                              | 0.00263 | 1.2942                              | 0.03825 | 0.13983                             | 0.00249 | 841                                  | 79  | 843                                 | 17 | 844                                 | 14 | 100         |
| 19BK-37-70 | 0.58 | 0.06595                              | 0.00248 | 1.2318                              | 0.03398 | 0.13544                             | 0.00237 | 805                                  | 77  | 815                                 | 15 | 819                                 | 13 | 100         |
| 19BK-37-71 | 1.70 | 0.07496                              | 0.00647 | 1.2255                              | 0.09952 | 0.11855                             | 0.00338 | 1068                                 | 164 | 812                                 | 45 | 722                                 | 19 | 148         |

| Spot       | Th/U | Isotope ratios                    |            |                                  |            | Ages                             |            |                                   |            |                                  |            |                                  |            | Concordance |
|------------|------|-----------------------------------|------------|----------------------------------|------------|----------------------------------|------------|-----------------------------------|------------|----------------------------------|------------|----------------------------------|------------|-------------|
|            |      | $^{207}\text{Pb}/^{206}\text{Pb}$ | 1 $\sigma$ | $^{207}\text{Pb}/^{235}\text{U}$ | 1 $\sigma$ | $^{206}\text{Pb}/^{238}\text{U}$ | 1 $\sigma$ | $^{207}\text{Pb}/^{206}\text{Pb}$ | 1 $\sigma$ | $^{207}\text{Pb}/^{235}\text{U}$ | 1 $\sigma$ | $^{206}\text{Pb}/^{238}\text{U}$ | 1 $\sigma$ |             |
| 19BK-37-72 | 1.32 | 0.19166                           | 0.00636    | 3.6929                           | 0.07777    | 0.13973                          | 0.00245    | 2756                              | 53         | 1570                             | 17         | 843                              | 14         | 327         |
| NIST610    | 0.99 | 0.90887                           | 0.02755    | 25.1367                          | 0.41654    | 0.20056                          | 0.00330    | 5103                              | 42         | 3314                             | 16         | 1178                             | 18         | 433         |
| 91500      | 0.37 | 0.07346                           | 0.00274    | 1.8151                           | 0.04938    | 0.17917                          | 0.00318    | 1027                              | 74         | 1051                             | 18         | 1063                             | 17         | 97          |
| GJ-1       | 0.06 | 0.05895                           | 0.00215    | 0.7996                           | 0.02066    | 0.09837                          | 0.00168    | 565                               | 77         | 597                              | 12         | 605                              | 10         | 99          |
| 19BK-37-73 | 0.60 | 0.11856                           | 0.00409    | 5.6091                           | 0.13202    | 0.34308                          | 0.00621    | 1935                              | 60         | 1918                             | 20         | 1902                             | 30         | 102         |
| 19BK-37-74 | 1.40 | 0.06651                           | 0.00279    | 1.1673                           | 0.03850    | 0.12726                          | 0.00232    | 823                               | 85         | 785                              | 18         | 772                              | 13         | 102         |
| 19BK-37-75 | 2.03 | 0.06583                           | 0.00395    | 1.2127                           | 0.06507    | 0.13358                          | 0.00298    | 801                               | 121        | 806                              | 30         | 808                              | 17         | 100         |
| 19BK-37-76 | 0.59 | 0.06713                           | 0.00226    | 1.2908                           | 0.02842    | 0.13945                          | 0.00235    | 842                               | 69         | 842                              | 13         | 842                              | 13         | 100         |
| 19BK-37-77 | 1.21 | 0.08669                           | 0.00338    | 1.4436                           | 0.04207    | 0.12077                          | 0.00220    | 1354                              | 73         | 907                              | 17         | 735                              | 13         | 184         |
| 19BK-37-78 | 0.98 | 0.06732                           | 0.00273    | 1.1921                           | 0.03737    | 0.12840                          | 0.00233    | 848                               | 82         | 797                              | 17         | 779                              | 13         | 102         |
| 91500      | 0.37 | 0.07659                           | 0.00286    | 1.8897                           | 0.05144    | 0.17892                          | 0.00319    | 1111                              | 73         | 1078                             | 18         | 1061                             | 17         | 105         |
| 19BK-37-79 | 1.00 | 0.06619                           | 0.00350    | 1.1685                           | 0.05355    | 0.12802                          | 0.00265    | 812                               | 107        | 786                              | 25         | 777                              | 15         | 101         |
| 19BK-37-80 | 1.25 | 0.06403                           | 0.00234    | 1.1094                           | 0.02900    | 0.12566                          | 0.00217    | 743                               | 76         | 758                              | 14         | 763                              | 12         | 99          |
| 19BK-37-81 | 1.33 | 0.06588                           | 0.00233    | 1.1882                           | 0.02918    | 0.13078                          | 0.00224    | 803                               | 73         | 795                              | 14         | 792                              | 13         | 100         |
| 19BK-37-82 | 1.17 | 0.06836                           | 0.00332    | 1.325                            | 0.05437    | 0.14056                          | 0.00277    | 879                               | 98         | 857                              | 24         | 848                              | 16         | 101         |
| 19BK-37-83 | 0.92 | 0.06402                           | 0.00266    | 1.1112                           | 0.03617    | 0.12588                          | 0.00228    | 742                               | 85         | 759                              | 17         | 764                              | 13         | 99          |
| 19BK-37-84 | 0.94 | 0.06556                           | 0.00225    | 1.214                            | 0.02785    | 0.13433                          | 0.00228    | 792                               | 70         | 807                              | 13         | 813                              | 13         | 99          |
| NIST610    | 0.99 | 0.90276                           | 0.02737    | 24.832                           | 0.41265    | 0.19947                          | 0.00329    | 5093                              | 42         | 3302                             | 16         | 1173                             | 18         | 434         |
| 91500      | 0.37 | 0.07532                           | 0.00281    | 1.861                            | 0.05045    | 0.17918                          | 0.00319    | 1077                              | 73         | 1067                             | 18         | 1063                             | 17         | 101         |
| GJ-1       | 0.07 | 0.05971                           | 0.00216    | 0.822                            | 0.02109    | 0.09985                          | 0.00171    | 593                               | 76         | 609                              | 12         | 614                              | 10         | 99          |
| 19BK-37-85 | 1.37 | 0.06335                           | 0.00242    | 1.12918                          | 0.03187    | 0.12925                          | 0.00227    | 720                               | 79         | 767                              | 15         | 784                              | 13         | 98          |
| 19BK-37-86 | 1.28 | 0.06358                           | 0.00222    | 1.03741                          | 0.02471    | 0.11834                          | 0.00201    | 728                               | 72         | 723                              | 12         | 721                              | 12         | 100         |
| 19BK-37-87 | 1.29 | 0.06545                           | 0.00319    | 1.17561                          | 0.04841    | 0.13027                          | 0.00253    | 789                               | 99         | 789                              | 23         | 789                              | 14         | 100         |
| 19BK-37-88 | 1.38 | 0.06591                           | 0.00247    | 1.19327                          | 0.03272    | 0.13129                          | 0.00230    | 804                               | 77         | 798                              | 15         | 795                              | 13         | 100         |
| 19BK-37-89 | 1.62 | 0.06685                           | 0.00293    | 1.19093                          | 0.04201    | 0.12920                          | 0.00244    | 833                               | 89         | 796                              | 19         | 783                              | 14         | 102         |
| 19BK-37-90 | 1.17 | 0.06447                           | 0.00253    | 1.18814                          | 0.03528    | 0.13364                          | 0.00238    | 757                               | 81         | 795                              | 16         | 809                              | 14         | 98          |
| NIST610    | 0.98 | 0.90714                           | 0.02750    | 25.09638                         | 0.41755    | 0.20063                          | 0.00332    | 5100                              | 42         | 3312                             | 16         | 1179                             | 18         | 433         |
| 91500      | 0.37 | 0.07498                           | 0.00281    | 1.85300                          | 0.05073    | 0.17922                          | 0.00320    | 1068                              | 73         | 1065                             | 18         | 1063                             | 18         | 100         |
| GJ-1       | 0.07 | 0.05783                           | 0.00210    | 0.77850                          | 0.02010    | 0.09762                          | 0.00167    | 523                               | 78         | 585                              | 11         | 600                              | 10         | 97          |

| Spot       | Th/U | Isotope ratios                    |            |                                  |            | Ages                             |            |                                   |            |                                  |            |                                  |            | Concordance |
|------------|------|-----------------------------------|------------|----------------------------------|------------|----------------------------------|------------|-----------------------------------|------------|----------------------------------|------------|----------------------------------|------------|-------------|
|            |      | $^{207}\text{Pb}/^{206}\text{Pb}$ | 1 $\sigma$ | $^{207}\text{Pb}/^{235}\text{U}$ | 1 $\sigma$ | $^{206}\text{Pb}/^{238}\text{U}$ | 1 $\sigma$ | $^{207}\text{Pb}/^{206}\text{Pb}$ | 1 $\sigma$ | $^{207}\text{Pb}/^{235}\text{U}$ | 1 $\sigma$ | $^{206}\text{Pb}/^{238}\text{U}$ | 1 $\sigma$ |             |
| 19BK-39    |      |                                   |            |                                  |            |                                  |            |                                   |            |                                  |            |                                  |            |             |
| NIST610    | 0.98 | 0.92369                           | 0.02851    | 26.15854                         | 0.41202    | 0.20525                          | 0.00315    | 5126                              | 43         | 3353                             | 15         | 1203                             | 17         | 426         |
| 91500      | 0.37 | 0.07411                           | 0.00307    | 1.83421                          | 0.05782    | 0.17938                          | 0.00318    | 1044                              | 81         | 1058                             | 21         | 1064                             | 17         | 98          |
| GJ-1       | 0.07 | 0.06079                           | 0.00220    | 0.84204                          | 0.02047    | 0.10039                          | 0.00161    | 632                               | 76         | 620                              | 11         | 617                              | 9          | 101         |
| 19BK-39-01 | 1.21 | 0.06759                           | 0.00279    | 1.1478                           | 0.03581    | 0.12307                          | 0.00211    | 856                               | 83         | 776                              | 17         | 748                              | 12         | 104         |
| 19BK-39-02 | 0.12 | 0.13897                           | 0.00505    | 7.8144                           | 0.19827    | 0.40753                          | 0.00757    | 2215                              | 62         | 2210                             | 23         | 2204                             | 35         | 100         |
| 19BK-39-03 | 1.30 | 0.06752                           | 0.00335    | 1.2063                           | 0.05004    | 0.12949                          | 0.00243    | 854                               | 100        | 804                              | 23         | 785                              | 14         | 102         |
| 19BK-39-04 | 1.15 | 0.07010                           | 0.00276    | 1.3657                           | 0.03929    | 0.14120                          | 0.00239    | 931                               | 79         | 874                              | 17         | 851                              | 14         | 103         |
| 19BK-39-05 | 0.95 | 0.06874                           | 0.00374    | 1.2552                           | 0.05888    | 0.13233                          | 0.00264    | 891                               | 108        | 826                              | 27         | 801                              | 15         | 103         |
| 19BK-39-06 | 1.76 | 0.12740                           | 0.00418    | 6.4098                           | 0.12573    | 0.36465                          | 0.00595    | 2062                              | 57         | 2034                             | 17         | 2004                             | 28         | 103         |
| 91500      | 0.38 | 0.07535                           | 0.00317    | 1.8684                           | 0.06051    | 0.17972                          | 0.00322    | 1078                              | 82         | 1070                             | 21         | 1066                             | 18         | 101         |
| 19BK-39-07 | 1.30 | 0.07004                           | 0.00298    | 1.1444                           | 0.03778    | 0.11844                          | 0.00206    | 929                               | 85         | 775                              | 18         | 722                              | 12         | 107         |
| 19BK-39-08 | 0.59 | 0.06798                           | 0.00295    | 1.2584                           | 0.04283    | 0.13416                          | 0.00238    | 868                               | 87         | 827                              | 19         | 812                              | 14         | 102         |
| 19BK-39-09 | 0.77 | 0.07268                           | 0.00302    | 1.2317                           | 0.03897    | 0.12282                          | 0.00213    | 1005                              | 82         | 815                              | 18         | 747                              | 12         | 135         |
| 19BK-39-10 | 0.59 | 0.06928                           | 0.00284    | 1.3121                           | 0.04072    | 0.13728                          | 0.00236    | 907                               | 82         | 851                              | 18         | 829                              | 13         | 103         |
| 19BK-39-11 | 1.02 | 0.06735                           | 0.00268    | 1.2306                           | 0.03623    | 0.13244                          | 0.00225    | 849                               | 81         | 815                              | 16         | 802                              | 13         | 102         |
| 19BK-39-12 | 1.16 | 0.12572                           | 0.00410    | 6.2974                           | 0.12122    | 0.36305                          | 0.00590    | 2039                              | 57         | 2018                             | 17         | 1997                             | 28         | 102         |
| NIST610    | 0.98 | 0.92298                           | 0.02847    | 25.7367                          | 0.40909    | 0.20211                          | 0.00314    | 5125                              | 43         | 3337                             | 16         | 1187                             | 17         | 432         |
| 91500      | 0.37 | 0.07637                           | 0.00287    | 1.8879                           | 0.05013    | 0.17917                          | 0.00303    | 1105                              | 73         | 1077                             | 18         | 1063                             | 17         | 104         |
| GJ-1       | 0.07 | 0.06022                           | 0.00222    | 0.8366                           | 0.02138    | 0.10068                          | 0.00163    | 612                               | 78         | 617                              | 12         | 618                              | 10         | 100         |
| 19BK-39-13 | 1.15 | 0.06575                           | 0.00222    | 1.1521                           | 0.02407    | 0.12700                          | 0.00201    | 798                               | 69         | 778                              | 11         | 771                              | 11         | 101         |
| 19BK-39-14 | 1.25 | 0.06565                           | 0.00315    | 1.1735                           | 0.04645    | 0.12956                          | 0.00238    | 795                               | 97         | 788                              | 22         | 785                              | 14         | 100         |
| 19BK-39-15 | 1.89 | 0.07024                           | 0.00518    | 1.2334                           | 0.08380    | 0.12728                          | 0.00313    | 935                               | 144        | 816                              | 38         | 772                              | 18         | 106         |
| 19BK-39-16 | 1.23 | 0.06507                           | 0.00239    | 1.1515                           | 0.02916    | 0.12828                          | 0.00210    | 777                               | 75         | 778                              | 14         | 778                              | 12         | 100         |
| 19BK-39-17 | 1.43 | 0.06927                           | 0.00277    | 1.2610                           | 0.03750    | 0.13194                          | 0.00226    | 907                               | 80         | 828                              | 17         | 799                              | 13         | 104         |
| 19BK-39-18 | 0.94 | 0.06690                           | 0.00225    | 1.1995                           | 0.02476    | 0.12996                          | 0.00206    | 835                               | 68         | 800                              | 11         | 788                              | 12         | 102         |
| 91500      | 0.37 | 0.07540                           | 0.00283    | 1.8612                           | 0.04926    | 0.17892                          | 0.00302    | 1079                              | 73         | 1067                             | 17         | 1061                             | 17         | 102         |
| 19BK-39-19 | 1.36 | 0.06808                           | 0.00336    | 1.0891                           | 0.04491    | 0.11596                          | 0.00219    | 871                               | 99         | 748                              | 22         | 707                              | 13         | 106         |
| 19BK-39-20 | 1.17 | 0.06416                           | 0.00264    | 1.0681                           | 0.03331    | 0.12066                          | 0.00207    | 747                               | 85         | 738                              | 16         | 734                              | 12         | 100         |
| 19BK-39-21 | 1.01 | 0.06506                           | 0.00236    | 1.0635                           | 0.02625    | 0.11849                          | 0.00194    | 776                               | 74         | 736                              | 13         | 722                              | 11         | 102         |
| 19BK-39-22 | 1.11 | 0.06525                           | 0.00256    | 1.1018                           | 0.03163    | 0.12240                          | 0.00207    | 782                               | 80         | 754                              | 15         | 744                              | 12         | 101         |
| 19BK-39-23 | 1.44 | 0.06716                           | 0.00310    | 1.0916                           | 0.04096    | 0.11783                          | 0.00215    | 843                               | 93         | 749                              | 20         | 718                              | 12         | 104         |

| Spot       | Th/U | Isotope ratios                    |            |                                  |            | Ages                             |            |                                   |            |                                  |            |                                  |            | Concordance |
|------------|------|-----------------------------------|------------|----------------------------------|------------|----------------------------------|------------|-----------------------------------|------------|----------------------------------|------------|----------------------------------|------------|-------------|
|            |      | $^{207}\text{Pb}/^{206}\text{Pb}$ | 1 $\sigma$ | $^{207}\text{Pb}/^{235}\text{U}$ | 1 $\sigma$ | $^{206}\text{Pb}/^{238}\text{U}$ | 1 $\sigma$ | $^{207}\text{Pb}/^{206}\text{Pb}$ | 1 $\sigma$ | $^{207}\text{Pb}/^{235}\text{U}$ | 1 $\sigma$ | $^{206}\text{Pb}/^{238}\text{U}$ | 1 $\sigma$ |             |
| 19BK-39-24 | 0.90 | 0.06598                           | 0.00265    | 1.1181                           | 0.03358    | 0.12283                          | 0.00210    | 806                               | 82         | 762                              | 16         | 747                              | 12         | 102         |
| NIST610    | 1.00 | 0.92511                           | 0.02850    | 24.6460                          | 0.39426    | 0.19312                          | 0.00302    | 5128                              | 43         | 3294                             | 16         | 1138                             | 16         | 451         |
| 91500      | 0.37 | 0.07472                           | 0.00291    | 1.8436                           | 0.05268    | 0.17884                          | 0.00310    | 1061                              | 77         | 1061                             | 19         | 1061                             | 17         | 100         |
| GJ-1       | 0.07 | 0.06033                           | 0.00224    | 0.8143                           | 0.02105    | 0.09785                          | 0.00160    | 615                               | 78         | 605                              | 12         | 602                              | 9          | 101         |
| 19BK-39-25 | 0.93 | 0.06742                           | 0.00308    | 1.2305                           | 0.04543    | 0.13230                          | 0.00241    | 851                               | 92         | 815                              | 21         | 801                              | 14         | 102         |
| 19BK-39-26 | 0.92 | 0.06555                           | 0.00299    | 1.0745                           | 0.03967    | 0.11882                          | 0.00215    | 792                               | 93         | 741                              | 19         | 724                              | 12         | 102         |
| 19BK-39-27 | 1.04 | 0.06851                           | 0.00387    | 1.1264                           | 0.05562    | 0.11918                          | 0.00243    | 884                               | 113        | 766                              | 27         | 726                              | 14         | 106         |
| 19BK-39-28 | 0.80 | 0.07379                           | 0.00308    | 1.3184                           | 0.04229    | 0.12952                          | 0.00229    | 1036                              | 82         | 854                              | 19         | 785                              | 13         | 132         |
| 19BK-39-29 | 1.27 | 0.06546                           | 0.00275    | 1.1502                           | 0.03728    | 0.12737                          | 0.00224    | 789                               | 86         | 777                              | 18         | 773                              | 13         | 101         |
| 19BK-39-30 | 1.02 | 0.06620                           | 0.00298    | 1.1269                           | 0.04076    | 0.12340                          | 0.00223    | 813                               | 91         | 766                              | 19         | 750                              | 13         | 102         |
| 91500      | 0.38 | 0.07460                           | 0.00287    | 1.8443                           | 0.05163    | 0.17922                          | 0.00309    | 1058                              | 76         | 1061                             | 18         | 1063                             | 17         | 100         |
| 19BK-39-31 | 0.78 | 0.06913                           | 0.00273    | 1.14495                          | 0.03351    | 0.12007                          | 0.00206    | 903                               | 80         | 775                              | 16         | 731                              | 12         | 106         |
| 19BK-39-32 | 0.76 | 0.06426                           | 0.00293    | 1.0663                           | 0.03934    | 0.12030                          | 0.00215    | 750                               | 93         | 737                              | 19         | 732                              | 12         | 101         |
| 19BK-39-33 | 0.80 | 0.06485                           | 0.00289    | 1.1842                           | 0.04225    | 0.13238                          | 0.00240    | 770                               | 91         | 793                              | 20         | 801                              | 14         | 99          |
| 19BK-39-34 | 0.74 | 0.06593                           | 0.00263    | 1.0956                           | 0.03256    | 0.12047                          | 0.00206    | 804                               | 81         | 751                              | 16         | 733                              | 12         | 102         |
| 19BK-39-35 | 1.04 | 0.07822                           | 0.00554    | 1.3988                           | 0.09059    | 0.12964                          | 0.00330    | 1153                              | 134        | 888                              | 38         | 786                              | 19         | 147         |
| 19BK-39-36 | 0.84 | 0.06386                           | 0.00235    | 1.0636                           | 0.02720    | 0.12075                          | 0.00200    | 737                               | 76         | 736                              | 13         | 735                              | 12         | 100         |
| NIST610    | 0.99 | 0.91562                           | 0.02817    | 24.6484                          | 0.39733    | 0.19516                          | 0.00308    | 5113                              | 43         | 3294                             | 16         | 1149                             | 17         | 445         |
| 91500      | 0.36 | 0.07278                           | 0.00291    | 1.7976                           | 0.05405    | 0.17906                          | 0.00317    | 1008                              | 79         | 1045                             | 20         | 1062                             | 17         | 95          |
| GJ-1       | 0.07 | 0.06137                           | 0.00227    | 0.8056                           | 0.02082    | 0.09517                          | 0.00157    | 652                               | 77         | 600                              | 12         | 586                              | 9          | 102         |
| 19BK-39-37 | 0.81 | 0.06470                           | 0.00369    | 1.1002                           | 0.05511    | 0.12328                          | 0.00249    | 765                               | 116        | 753                              | 27         | 749                              | 14         | 101         |
| 19BK-39-38 | 1.83 | 0.06644                           | 0.00278    | 1.1836                           | 0.03822    | 0.12915                          | 0.00228    | 820                               | 85         | 793                              | 18         | 783                              | 13         | 101         |
| 19BK-39-39 | 1.19 | 0.06637                           | 0.00266    | 1.2035                           | 0.03627    | 0.13146                          | 0.00227    | 818                               | 82         | 802                              | 17         | 796                              | 13         | 101         |
| 19BK-39-40 | 0.95 | 0.06164                           | 0.00285    | 1.0422                           | 0.03923    | 0.12258                          | 0.00224    | 662                               | 96         | 725                              | 20         | 745                              | 13         | 97          |
| 19BK-39-41 | 1.27 | 0.06617                           | 0.00257    | 1.156                            | 0.03298    | 0.12671                          | 0.00216    | 812                               | 79         | 780                              | 16         | 769                              | 12         | 101         |
| 19BK-39-42 | 0.94 | 0.06392                           | 0.00521    | 1.1198                           | 0.08524    | 0.12702                          | 0.00337    | 739                               | 164        | 763                              | 41         | 771                              | 19         | 99          |
| 91500      | 0.37 | 0.07511                           | 0.00310    | 1.8545                           | 0.05895    | 0.17901                          | 0.00324    | 1072                              | 81         | 1065                             | 21         | 1062                             | 18         | 101         |
| 19BK-39-43 | 1.26 | 0.06664                           | 0.00250    | 1.1286                           | 0.03002    | 0.12279                          | 0.00207    | 827                               | 76         | 767                              | 14         | 747                              | 12         | 103         |
| 19BK-39-44 | 1.34 | 0.06748                           | 0.00308    | 1.0893                           | 0.04017    | 0.11703                          | 0.00217    | 853                               | 92         | 748                              | 20         | 714                              | 13         | 105         |
| 19BK-39-45 | 0.86 | 0.06335                           | 0.00460    | 1.0739                           | 0.07187    | 0.12291                          | 0.00297    | 720                               | 147        | 741                              | 35         | 747                              | 17         | 99          |
| 19BK-39-46 | 0.90 | 0.06851                           | 0.00309    | 1.1499                           | 0.04179    | 0.12170                          | 0.00225    | 884                               | 91         | 777                              | 20         | 740                              | 13         | 105         |
| 19BK-39-47 | 0.81 | 0.06663                           | 0.00222    | 1.1830                           | 0.02433    | 0.12874                          | 0.00207    | 826                               | 68         | 793                              | 11         | 781                              | 12         | 102         |

| Spot       | Th/U | Isotope ratios                    |            |                                  |            | Ages                             |            |                                   |            |                                  |            |                                  |            | Concordance |
|------------|------|-----------------------------------|------------|----------------------------------|------------|----------------------------------|------------|-----------------------------------|------------|----------------------------------|------------|----------------------------------|------------|-------------|
|            |      | $^{207}\text{Pb}/^{206}\text{Pb}$ | 1 $\sigma$ | $^{207}\text{Pb}/^{235}\text{U}$ | 1 $\sigma$ | $^{206}\text{Pb}/^{238}\text{U}$ | 1 $\sigma$ | $^{207}\text{Pb}/^{206}\text{Pb}$ | 1 $\sigma$ | $^{207}\text{Pb}/^{235}\text{U}$ | 1 $\sigma$ | $^{206}\text{Pb}/^{238}\text{U}$ | 1 $\sigma$ |             |
| 19BK-39-48 | 0.90 | 0.06606                           | 0.00227    | 1.1779                           | 0.02622    | 0.12929                          | 0.00211    | 808                               | 70         | 790                              | 12         | 784                              | 12         | 101         |
| NIST610    | 0.98 | 0.91733                           | 0.02819    | 24.4074                          | 0.39618    | 0.19292                          | 0.00307    | 5116                              | 43         | 3285                             | 16         | 1137                             | 17         | 450         |
| 91500      | 0.36 | 0.07369                           | 0.00309    | 1.8227                           | 0.05956    | 0.17936                          | 0.00329    | 1033                              | 83         | 1054                             | 21         | 1064                             | 18         | 97          |
| GJ-1       | 0.07 | 0.05885                           | 0.00218    | 0.7705                           | 0.02013    | 0.09494                          | 0.00158    | 561                               | 79         | 580                              | 12         | 585                              | 9          | 99          |
| 19BK-39-49 | 1.19 | 0.06903                           | 0.00268    | 1.2119                           | 0.03443    | 0.12730                          | 0.00219    | 900                               | 78         | 806                              | 16         | 772                              | 13         | 104         |
| 19BK-39-50 | 1.13 | 0.06686                           | 0.00287    | 1.1727                           | 0.03967    | 0.12719                          | 0.00228    | 833                               | 87         | 788                              | 19         | 772                              | 13         | 102         |
| 19BK-39-51 | 1.17 | 0.06499                           | 0.00309    | 1.1558                           | 0.04540    | 0.12897                          | 0.00241    | 774                               | 97         | 780                              | 21         | 782                              | 14         | 100         |
| 19BK-39-52 | 1.04 | 0.06692                           | 0.00267    | 1.156                            | 0.03449    | 0.12521                          | 0.00218    | 835                               | 81         | 780                              | 16         | 761                              | 12         | 103         |
| 19BK-39-53 | 0.99 | 0.06396                           | 0.00243    | 1.0730                           | 0.02929    | 0.12166                          | 0.00207    | 740                               | 78         | 740                              | 14         | 740                              | 12         | 100         |
| 19BK-39-54 | 1.44 | 0.06979                           | 0.00362    | 1.1602                           | 0.05142    | 0.12054                          | 0.00238    | 922                               | 103        | 782                              | 24         | 734                              | 14         | 107         |
| 91500      | 0.36 | 0.07622                           | 0.00314    | 1.8886                           | 0.05975    | 0.17967                          | 0.00328    | 1101                              | 80         | 1077                             | 21         | 1065                             | 18         | 103         |
| 19BK-39-55 | 2.03 | 0.06572                           | 0.00239    | 1.1573                           | 0.02928    | 0.12769                          | 0.00214    | 798                               | 75         | 781                              | 14         | 775                              | 12         | 101         |
| 19BK-39-56 | 0.97 | 0.06763                           | 0.00290    | 1.1482                           | 0.03878    | 0.12312                          | 0.00223    | 857                               | 87         | 776                              | 18         | 749                              | 13         | 104         |
| 19BK-39-57 | 1.06 | 0.06669                           | 0.00384    | 1.1540                           | 0.05851    | 0.12549                          | 0.00269    | 828                               | 116        | 779                              | 28         | 762                              | 15         | 102         |
| 19BK-39-58 | 0.78 | 0.06567                           | 0.00272    | 1.176                            | 0.03750    | 0.12990                          | 0.00230    | 796                               | 84         | 790                              | 18         | 787                              | 13         | 100         |
| 19BK-39-59 | 1.01 | 0.06728                           | 0.00556    | 1.0982                           | 0.08481    | 0.11837                          | 0.00328    | 846                               | 163        | 753                              | 41         | 721                              | 19         | 104         |
| 19BK-39-60 | 1.60 | 0.06312                           | 0.00258    | 1.0922                           | 0.03402    | 0.12549                          | 0.00220    | 712                               | 84         | 750                              | 17         | 762                              | 13         | 98          |
| NIST610    | 0.98 | 0.91196                           | 0.02799    | 24.7670                          | 0.40506    | 0.19695                          | 0.00316    | 5108                              | 43         | 3299                             | 16         | 1159                             | 17         | 441         |
| 91500      | 0.36 | 0.07323                           | 0.00289    | 1.8146                           | 0.05360    | 0.17970                          | 0.00320    | 1020                              | 78         | 1051                             | 19         | 1065                             | 17         | 96          |
| GJ-1       | 0.07 | 0.06016                           | 0.00222    | 0.7979                           | 0.02078    | 0.09618                          | 0.00161    | 609                               | 78         | 596                              | 12         | 592                              | 9          | 101         |
| 19BK-39-61 | 0.98 | 0.06405                           | 0.00241    | 1.0940                           | 0.02959    | 0.12388                          | 0.00211    | 743                               | 78         | 750                              | 14         | 753                              | 12         | 100         |
| 19BK-39-62 | 1.40 | 0.06642                           | 0.00288    | 1.2035                           | 0.04140    | 0.13140                          | 0.00239    | 820                               | 88         | 802                              | 19         | 796                              | 14         | 101         |
| 19BK-39-63 | 1.23 | 0.06876                           | 0.00288    | 1.1191                           | 0.03646    | 0.11804                          | 0.00212    | 892                               | 84         | 763                              | 17         | 719                              | 12         | 106         |
| 19BK-39-64 | 0.95 | 0.06918                           | 0.00301    | 1.2839                           | 0.04439    | 0.13461                          | 0.00247    | 904                               | 87         | 839                              | 20         | 814                              | 14         | 103         |
| 19BK-39-65 | 0.52 | 0.06927                           | 0.00341    | 1.2935                           | 0.05352    | 0.13544                          | 0.00264    | 907                               | 98         | 843                              | 24         | 819                              | 15         | 103         |
| 19BK-39-66 | 1.13 | 0.09244                           | 0.00433    | 1.5898                           | 0.06092    | 0.12473                          | 0.00248    | 1476                              | 86         | 966                              | 24         | 758                              | 14         | 195         |
| 91500      | 0.37 | 0.07325                           | 0.00279    | 1.8065                           | 0.05009    | 0.17888                          | 0.00313    | 1021                              | 75         | 1048                             | 18         | 1061                             | 17         | 96          |
| 19BK-39-67 | 1.80 | 0.06291                           | 0.00268    | 1.0053                           | 0.03359    | 0.11589                          | 0.00206    | 705                               | 88         | 707                              | 17         | 707                              | 12         | 100         |
| 19BK-39-68 | 0.21 | 0.16088                           | 0.00501    | 10.5120                          | 0.18435    | 0.47393                          | 0.00775    | 2465                              | 52         | 2481                             | 16         | 2501                             | 34         | 99          |
| 19BK-39-69 | 1.18 | 0.06394                           | 0.00252    | 1.0984                           | 0.03243    | 0.12460                          | 0.00217    | 740                               | 81         | 753                              | 16         | 757                              | 12         | 99          |
| 19BK-39-70 | 1.17 | 0.12721                           | 0.00517    | 6.3399                           | 0.20192    | 0.36149                          | 0.00753    | 2060                              | 70         | 2024                             | 28         | 1989                             | 36         | 104         |
| 19BK-39-71 | 1.39 | 0.06629                           | 0.00233    | 1.1449                           | 0.02695    | 0.12527                          | 0.00209    | 816                               | 72         | 775                              | 13         | 761                              | 12         | 102         |

| Spot       | Th/U | Isotope ratios                    |            |                                  |            | Ages                             |            |                                   |            |                                  |            |                                  |            | Concordance |
|------------|------|-----------------------------------|------------|----------------------------------|------------|----------------------------------|------------|-----------------------------------|------------|----------------------------------|------------|----------------------------------|------------|-------------|
|            |      | $^{207}\text{Pb}/^{206}\text{Pb}$ | 1 $\sigma$ | $^{207}\text{Pb}/^{235}\text{U}$ | 1 $\sigma$ | $^{206}\text{Pb}/^{238}\text{U}$ | 1 $\sigma$ | $^{207}\text{Pb}/^{206}\text{Pb}$ | 1 $\sigma$ | $^{207}\text{Pb}/^{235}\text{U}$ | 1 $\sigma$ | $^{206}\text{Pb}/^{238}\text{U}$ | 1 $\sigma$ |             |
| 19BK-39-72 | 1.23 | 0.06443                           | 0.00286    | 1.0606                           | 0.03786    | 0.11941                          | 0.00220    | 756                               | 91         | 734                              | 19         | 727                              | 13         | 101         |
| NIST610    | 0.99 | 0.91423                           | 0.02802    | 25.4211                          | 0.41885    | 0.20169                          | 0.00327    | 5111                              | 43         | 3325                             | 16         | 1184                             | 18         | 432         |
| 91500      | 0.36 | 0.07558                           | 0.00290    | 1.8682                           | 0.05278    | 0.17929                          | 0.00318    | 1084                              | 75         | 1070                             | 19         | 1063                             | 17         | 102         |
| GJ-1       | 0.07 | 0.06134                           | 0.00227    | 0.8222                           | 0.02152    | 0.09724                          | 0.00164    | 651                               | 77         | 609                              | 12         | 598                              | 10         | 102         |
| 19BK-39-73 | 1.51 | 0.06312                           | 0.00234    | 1.1000                           | 0.02907    | 0.12642                          | 0.00215    | 712                               | 77         | 753                              | 14         | 767                              | 12         | 98          |
| 19BK-39-74 | 1.12 | 0.06616                           | 0.00300    | 1.1461                           | 0.04216    | 0.12567                          | 0.00235    | 811                               | 92         | 775                              | 20         | 763                              | 13         | 102         |
| 19BK-39-75 | 1.24 | 0.06833                           | 0.00578    | 1.2286                           | 0.09773    | 0.13044                          | 0.00342    | 879                               | 166        | 814                              | 45         | 790                              | 20         | 103         |
| 19BK-39-76 | 1.01 | 0.12569                           | 0.00422    | 6.2396                           | 0.13533    | 0.36012                          | 0.00629    | 2039                              | 58         | 2010                             | 19         | 1983                             | 30         | 103         |
| 19BK-39-77 | 1.53 | 0.06562                           | 0.00276    | 1.1283                           | 0.03711    | 0.12473                          | 0.00225    | 794                               | 86         | 767                              | 18         | 758                              | 13         | 101         |
| 19BK-39-78 | 0.97 | 0.06765                           | 0.00260    | 1.2586                           | 0.03544    | 0.13498                          | 0.00236    | 858                               | 78         | 827                              | 16         | 816                              | 13         | 101         |
| 91500      | 0.36 | 0.07500                           | 0.00292    | 1.8512                           | 0.05352    | 0.17907                          | 0.00321    | 1068                              | 76         | 1064                             | 19         | 1062                             | 18         | 101         |
| 19BK-39-79 | 1.32 | 0.06441                           | 0.00294    | 1.1513                           | 0.04288    | 0.12968                          | 0.00242    | 755                               | 93         | 778                              | 20         | 786                              | 14         | 99          |
| 19BK-39-80 | 1.45 | 0.06401                           | 0.00268    | 1.1219                           | 0.03665    | 0.12715                          | 0.00230    | 742                               | 86         | 764                              | 18         | 772                              | 13         | 99          |
| 19BK-39-81 | 1.10 | 0.06643                           | 0.00250    | 1.1454                           | 0.03120    | 0.12509                          | 0.00216    | 820                               | 77         | 775                              | 15         | 760                              | 12         | 102         |
| 19BK-39-82 | 1.08 | 0.06359                           | 0.00259    | 1.091                            | 0.03403    | 0.12443                          | 0.00221    | 728                               | 84         | 749                              | 17         | 756                              | 13         | 99          |
| 19BK-39-83 | 0.75 | 0.06306                           | 0.00389    | 1.0719                           | 0.05938    | 0.12333                          | 0.00267    | 710                               | 126        | 740                              | 29         | 750                              | 15         | 99          |
| 19BK-39-84 | 1.53 | 0.06503                           | 0.00264    | 1.170                            | 0.03638    | 0.13057                          | 0.00233    | 775                               | 83         | 787                              | 17         | 791                              | 13         | 99          |
| NIST610    | 0.98 | 0.91146                           | 0.02790    | 24.991                           | 0.41464    | 0.19893                          | 0.00325    | 5107                              | 43         | 3308                             | 16         | 1170                             | 17         | 437         |
| 91500      | 0.36 | 0.07591                           | 0.00295    | 1.877                            | 0.05422    | 0.17943                          | 0.00322    | 1093                              | 76         | 1073                             | 19         | 1064                             | 18         | 103         |
| GJ-1       | 0.06 | 0.05977                           | 0.00220    | 0.801                            | 0.02097    | 0.09725                          | 0.00166    | 595                               | 78         | 598                              | 12         | 598                              | 10         | 100         |
| 19BK-39-85 | 1.12 | 0.06662                           | 0.00285    | 1.15515                          | 0.03913    | 0.12581                          | 0.00230    | 826                               | 87         | 780                              | 18         | 764                              | 13         | 102         |
| 19BK-39-86 | 1.22 | 0.06492                           | 0.00288    | 1.11744                          | 0.03983    | 0.12488                          | 0.00232    | 772                               | 91         | 762                              | 19         | 759                              | 13         | 100         |
| 19BK-39-87 | 0.70 | 0.06736                           | 0.00253    | 1.28870                          | 0.03504    | 0.13882                          | 0.00242    | 849                               | 76         | 841                              | 16         | 838                              | 14         | 100         |
| 19BK-39-88 | 1.04 | 0.06511                           | 0.00251    | 1.08942                          | 0.03100    | 0.12141                          | 0.00212    | 778                               | 79         | 748                              | 15         | 739                              | 12         | 101         |
| 19BK-39-89 | 1.60 | 0.06697                           | 0.00250    | 1.12528                          | 0.03017    | 0.12193                          | 0.00211    | 837                               | 76         | 766                              | 14         | 742                              | 12         | 103         |
| 19BK-39-90 | 1.00 | 0.06238                           | 0.00313    | 1.04105                          | 0.04439    | 0.12110                          | 0.00233    | 687                               | 104        | 724                              | 22         | 737                              | 13         | 98          |
| NIST610    | 0.98 | 0.91648                           | 0.02803    | 25.00599                         | 0.41650    | 0.19799                          | 0.00325    | 5115                              | 43         | 3308                             | 16         | 1165                             | 17         | 439         |
| 91500      | 0.36 | 0.07590                           | 0.00287    | 1.87192                          | 0.05154    | 0.17895                          | 0.00318    | 1093                              | 74         | 1071                             | 18         | 1061                             | 17         | 103         |
| GJ-1       | 0.06 | 0.05959                           | 0.00220    | 0.80318                          | 0.02121    | 0.09781                          | 0.00167    | 589                               | 78         | 599                              | 12         | 602                              | 10         | 100         |

| Spot       | Th/U | Isotope ratios                    |            |                                  |            | Ages                             |            |                                   |            |                                  |            |                                  |            | Concordance |
|------------|------|-----------------------------------|------------|----------------------------------|------------|----------------------------------|------------|-----------------------------------|------------|----------------------------------|------------|----------------------------------|------------|-------------|
|            |      | $^{207}\text{Pb}/^{206}\text{Pb}$ | 1 $\sigma$ | $^{207}\text{Pb}/^{235}\text{U}$ | 1 $\sigma$ | $^{206}\text{Pb}/^{238}\text{U}$ | 1 $\sigma$ | $^{207}\text{Pb}/^{206}\text{Pb}$ | 1 $\sigma$ | $^{207}\text{Pb}/^{235}\text{U}$ | 1 $\sigma$ | $^{206}\text{Pb}/^{238}\text{U}$ | 1 $\sigma$ |             |
| 19BK-42    |      |                                   |            |                                  |            |                                  |            |                                   |            |                                  |            |                                  |            |             |
| NIST610    | 0.99 | 0.92250                           | 0.02840    | 24.66902                         | 0.40488    | 0.19384                          | 0.00312    | 5124                              | 43         | 3295                             | 16         | 1142                             | 17         | 449         |
| 91500      | 0.36 | 0.07693                           | 0.00296    | 1.90485                          | 0.05368    | 0.17949                          | 0.00317    | 1119                              | 75         | 1083                             | 19         | 1064                             | 17         | 105         |
| GJ-1       | 0.07 | 0.05995                           | 0.00223    | 0.79184                          | 0.02078    | 0.09574                          | 0.00161    | 602                               | 78         | 592                              | 12         | 589                              | 9          | 100         |
| 19BK-42-01 | 0.86 | 0.06202                           | 0.00275    | 1.0646                           | 0.03773    | 0.12442                          | 0.00225    | 675                               | 92         | 736                              | 19         | 756                              | 13         | 97          |
| 19BK-42-02 | 0.81 | 0.06743                           | 0.00263    | 1.1784                           | 0.03400    | 0.12668                          | 0.00220    | 851                               | 79         | 791                              | 16         | 769                              | 13         | 103         |
| 19BK-42-03 | 1.24 | 0.06720                           | 0.00337    | 1.1002                           | 0.04660    | 0.11867                          | 0.00233    | 844                               | 101        | 753                              | 23         | 723                              | 13         | 104         |
| 19BK-42-04 | 1.33 | 0.06818                           | 0.00327    | 1.1475                           | 0.04573    | 0.12199                          | 0.00234    | 874                               | 96         | 776                              | 22         | 742                              | 13         | 105         |
| 19BK-42-05 | 1.34 | 0.08048                           | 0.00370    | 1.2584                           | 0.04695    | 0.11333                          | 0.00219    | 1209                              | 88         | 827                              | 21         | 692                              | 13         | 120         |
| 19BK-42-06 | 1.17 | 0.06561                           | 0.00264    | 1.1295                           | 0.03445    | 0.12478                          | 0.00220    | 794                               | 82         | 768                              | 16         | 758                              | 13         | 101         |
| 91500      | 0.36 | 0.07589                           | 0.00287    | 1.8794                           | 0.05151    | 0.17950                          | 0.00315    | 1092                              | 74         | 1074                             | 18         | 1064                             | 17         | 103         |
| 19BK-42-07 | 0.90 | 0.06274                           | 0.00441    | 1.1249                           | 0.07264    | 0.12996                          | 0.00305    | 699                               | 143        | 765                              | 35         | 788                              | 17         | 97          |
| 19BK-42-08 | 1.24 | 0.06318                           | 0.00230    | 1.1014                           | 0.02795    | 0.12635                          | 0.00213    | 714                               | 76         | 754                              | 14         | 767                              | 12         | 98          |
| 19BK-42-09 | 0.62 | 0.06883                           | 0.00247    | 1.3665                           | 0.03384    | 0.14390                          | 0.00243    | 894                               | 73         | 875                              | 15         | 867                              | 14         | 101         |
| 19BK-42-10 | 1.08 | 0.06356                           | 0.00263    | 1.1191                           | 0.03579    | 0.12761                          | 0.00227    | 727                               | 85         | 763                              | 17         | 774                              | 13         | 98          |
| 19BK-42-11 | 1.13 | 0.10866                           | 0.00404    | 4.6994                           | 0.12640    | 0.31350                          | 0.00582    | 1777                              | 66         | 1767                             | 23         | 1758                             | 29         | 101         |
| 19BK-42-12 | 0.65 | 0.06813                           | 0.00251    | 1.2661                           | 0.03298    | 0.13470                          | 0.00230    | 873                               | 75         | 831                              | 15         | 815                              | 13         | 102         |
| NIST610    | 0.99 | 0.91241                           | 0.02794    | 24.6680                          | 0.40575    | 0.19597                          | 0.00317    | 5108                              | 43         | 3295                             | 16         | 1154                             | 17         | 443         |
| 91500      | 0.37 | 0.07478                           | 0.00286    | 1.8486                           | 0.05197    | 0.17918                          | 0.00317    | 1063                              | 75         | 1063                             | 19         | 1063                             | 17         | 100         |
| GJ-1       | 0.07 | 0.06206                           | 0.00228    | 0.8289                           | 0.02143    | 0.09681                          | 0.00164    | 676                               | 77         | 613                              | 12         | 596                              | 10         | 103         |
| 19BK-42-13 | 1.16 | 0.06437                           | 0.00246    | 1.0931                           | 0.03051    | 0.12308                          | 0.00212    | 754                               | 79         | 750                              | 15         | 748                              | 12         | 100         |
| 19BK-42-14 | 1.02 | 0.06374                           | 0.00262    | 1.0698                           | 0.03398    | 0.12166                          | 0.00216    | 733                               | 85         | 739                              | 17         | 740                              | 12         | 100         |
| 19BK-42-15 | 1.01 | 0.06514                           | 0.00244    | 1.0941                           | 0.02949    | 0.12176                          | 0.00209    | 779                               | 77         | 751                              | 14         | 741                              | 12         | 101         |
| 19BK-42-16 | 0.85 | 0.06516                           | 0.00254    | 1.1832                           | 0.03441    | 0.13163                          | 0.00230    | 779                               | 80         | 793                              | 16         | 797                              | 13         | 99          |
| 19BK-42-17 | 0.96 | 0.06425                           | 0.00234    | 1.0655                           | 0.02726    | 0.12021                          | 0.00204    | 750                               | 75         | 737                              | 13         | 732                              | 12         | 101         |
| 19BK-42-18 | 1.36 | 0.06409                           | 0.00285    | 1.0703                           | 0.03841    | 0.12106                          | 0.00223    | 745                               | 91         | 739                              | 19         | 737                              | 13         | 100         |
| 91500      | 0.37 | 0.07549                           | 0.00283    | 1.8668                           | 0.05063    | 0.17924                          | 0.00315    | 1082                              | 73         | 1069                             | 18         | 1063                             | 17         | 102         |
| 19BK-42-19 | 0.98 | 0.06509                           | 0.00323    | 1.1488                           | 0.04814    | 0.12793                          | 0.00249    | 777                               | 101        | 777                              | 23         | 776                              | 14         | 100         |
| 19BK-42-20 | 1.17 | 0.06827                           | 0.00312    | 1.1816                           | 0.04419    | 0.12546                          | 0.00237    | 877                               | 92         | 792                              | 21         | 762                              | 14         | 104         |
| 19BK-42-21 | 1.02 | 0.06437                           | 0.00260    | 1.1302                           | 0.03480    | 0.12726                          | 0.00226    | 754                               | 83         | 768                              | 17         | 772                              | 13         | 99          |
| 19BK-42-22 | 1.27 | 0.06569                           | 0.00398    | 1.0898                           | 0.05892    | 0.12026                          | 0.00264    | 796                               | 122        | 748                              | 29         | 732                              | 15         | 102         |
| 19BK-42-23 | 1.48 | 0.06227                           | 0.00259    | 1.0445                           | 0.03388    | 0.12158                          | 0.00217    | 684                               | 86         | 726                              | 17         | 740                              | 12         | 98          |

| Spot       | Th/U | Isotope ratios                    |            |                                  |            | Ages                             |            |                                   |            |                                  |            | Concordance |                                  |            |
|------------|------|-----------------------------------|------------|----------------------------------|------------|----------------------------------|------------|-----------------------------------|------------|----------------------------------|------------|-------------|----------------------------------|------------|
|            |      | $^{207}\text{Pb}/^{206}\text{Pb}$ | 1 $\sigma$ | $^{207}\text{Pb}/^{235}\text{U}$ | 1 $\sigma$ | $^{206}\text{Pb}/^{238}\text{U}$ | 1 $\sigma$ | $^{207}\text{Pb}/^{206}\text{Pb}$ | 1 $\sigma$ | $^{207}\text{Pb}/^{235}\text{U}$ | 1 $\sigma$ |             | $^{206}\text{Pb}/^{238}\text{U}$ | 1 $\sigma$ |
| 19BK-42-24 | 0.87 | 0.07468                           | 0.00791    | 1.5914                           | 0.16137    | 0.15446                          | 0.00558    | 1060                              | 200        | 967                              | 63         | 926         | 31                               | 104        |
| NIST610    | 0.98 | 0.90134                           | 0.02746    | 24.4118                          | 0.40229    | 0.19632                          | 0.00320    | 5091                              | 42         | 3285                             | 16         | 1156        | 17                               | 441        |
| 91500      | 0.36 | 0.07190                           | 0.00279    | 1.7753                           | 0.05154    | 0.17898                          | 0.00320    | 983                               | 77         | 1036                             | 19         | 1061        | 17                               | 93         |
| GJ-1       | 0.07 | 0.05959                           | 0.00221    | 0.7874                           | 0.02084    | 0.09578                          | 0.00163    | 589                               | 78         | 590                              | 12         | 590         | 10                               | 100        |
| 19BK-42-25 | 0.84 | 0.06311                           | 0.00295    | 1.1016                           | 0.04248    | 0.12653                          | 0.00241    | 712                               | 96         | 754                              | 21         | 768         | 14                               | 98         |
| 19BK-42-26 | 0.79 | 0.06708                           | 0.00357    | 1.1479                           | 0.05292    | 0.12403                          | 0.00251    | 840                               | 107        | 776                              | 25         | 754         | 14                               | 103        |
| 19BK-42-27 | 1.25 | 0.06637                           | 0.00273    | 1.1002                           | 0.03498    | 0.12015                          | 0.00216    | 818                               | 84         | 753                              | 17         | 731         | 12                               | 103        |
| 19BK-42-28 | 0.91 | 0.06963                           | 0.00419    | 1.1559                           | 0.06195    | 0.12034                          | 0.00268    | 917                               | 119        | 780                              | 29         | 733         | 15                               | 106        |
| 19BK-42-29 | 1.73 | 0.06522                           | 0.00237    | 1.1503                           | 0.02960    | 0.12786                          | 0.00219    | 781                               | 75         | 777                              | 14         | 776         | 13                               | 100        |
| 19BK-42-30 | 1.08 | 0.06491                           | 0.00392    | 1.0936                           | 0.05895    | 0.12213                          | 0.00271    | 771                               | 122        | 750                              | 29         | 743         | 16                               | 101        |
| 91500      | 0.37 | 0.07307                           | 0.00273    | 1.8038                           | 0.04882    | 0.17895                          | 0.00316    | 1016                              | 74         | 1047                             | 18         | 1061        | 17                               | 96         |
| 19BK-42-31 | 0.72 | 0.06286                           | 0.00243    | 1.12033                          | 0.03221    | 0.12921                          | 0.00227    | 703                               | 80         | 763                              | 15         | 783         | 13                               | 97         |
| 19BK-42-32 | 0.92 | 0.06746                           | 0.00288    | 1.3374                           | 0.04525    | 0.14373                          | 0.00267    | 852                               | 86         | 862                              | 20         | 866         | 15                               | 100        |
| 19BK-42-33 | 1.46 | 0.06537                           | 0.00268    | 1.1488                           | 0.03645    | 0.12739                          | 0.00230    | 786                               | 84         | 777                              | 17         | 773         | 13                               | 100        |
| 19BK-42-34 | 1.37 | 0.06397                           | 0.00251    | 1.1004                           | 0.03256    | 0.12469                          | 0.00221    | 741                               | 81         | 754                              | 16         | 758         | 13                               | 99         |
| 19BK-42-35 | 1.16 | 0.06385                           | 0.00279    | 1.1794                           | 0.04148    | 0.13391                          | 0.00248    | 737                               | 90         | 791                              | 19         | 810         | 14                               | 98         |
| 19BK-42-36 | 0.84 | 0.06714                           | 0.00266    | 1.3446                           | 0.04035    | 0.14518                          | 0.00260    | 842                               | 80         | 865                              | 17         | 874         | 15                               | 99         |
| NIST610    | 0.97 | 0.91157                           | 0.02763    | 24.5384                          | 0.40517    | 0.19515                          | 0.00320    | 5107                              | 42         | 3290                             | 16         | 1149        | 17                               | 444        |
| 91500      | 0.36 | 0.07552                           | 0.00279    | 1.8634                           | 0.04966    | 0.17888                          | 0.00316    | 1082                              | 72         | 1068                             | 18         | 1061        | 17                               | 102        |
| GJ-1       | 0.07 | 0.06038                           | 0.00222    | 0.8036                           | 0.02112    | 0.09648                          | 0.00165    | 617                               | 77         | 599                              | 12         | 594         | 10                               | 101        |
| 19BK-42-37 | 1.00 | 0.06326                           | 0.00303    | 1.0892                           | 0.04376    | 0.12482                          | 0.00241    | 717                               | 99         | 748                              | 21         | 758         | 14                               | 99         |
| 19BK-42-38 | 1.05 | 0.06310                           | 0.00242    | 1.0997                           | 0.03140    | 0.12634                          | 0.00222    | 712                               | 80         | 753                              | 15         | 767         | 13                               | 98         |
| 19BK-42-39 | 1.48 | 0.06381                           | 0.00381    | 1.0462                           | 0.05564    | 0.11886                          | 0.00261    | 735                               | 121        | 727                              | 28         | 724         | 15                               | 100        |
| 19BK-42-40 | 1.14 | 0.06359                           | 0.00329    | 1.0421                           | 0.04639    | 0.11880                          | 0.00239    | 728                               | 106        | 725                              | 23         | 724         | 14                               | 100        |
| 19BK-42-41 | 1.27 | 0.06548                           | 0.00251    | 1.097                            | 0.03117    | 0.12143                          | 0.00214    | 790                               | 78         | 752                              | 15         | 739         | 12                               | 102        |
| 19BK-42-42 | 0.45 | 0.06567                           | 0.00340    | 1.1760                           | 0.05233    | 0.12983                          | 0.00266    | 796                               | 105        | 789                              | 24         | 787         | 15                               | 100        |
| 91500      | 0.36 | 0.07366                           | 0.00283    | 1.8199                           | 0.05236    | 0.17912                          | 0.00323    | 1032                              | 76         | 1053                             | 19         | 1062        | 18                               | 97         |
| 19BK-42-43 | 0.97 | 0.06803                           | 0.00314    | 1.2051                           | 0.04592    | 0.12844                          | 0.00248    | 869                               | 93         | 803                              | 21         | 779         | 14                               | 103        |
| 19BK-42-44 | 1.23 | 0.06512                           | 0.00235    | 1.0749                           | 0.02747    | 0.11968                          | 0.00206    | 778                               | 74         | 741                              | 13         | 729         | 12                               | 102        |
| 19BK-42-45 | 0.94 | 0.06486                           | 0.00299    | 1.0918                           | 0.04161    | 0.12205                          | 0.00233    | 770                               | 94         | 749                              | 20         | 742         | 13                               | 101        |
| 19BK-42-46 | 1.38 | 0.06387                           | 0.00316    | 1.0908                           | 0.04583    | 0.12382                          | 0.00242    | 737                               | 101        | 749                              | 22         | 753         | 14                               | 100        |
| 19BK-42-47 | 0.80 | 0.06276                           | 0.00440    | 1.0073                           | 0.06482    | 0.11637                          | 0.00283    | 700                               | 143        | 708                              | 33         | 710         | 16                               | 100        |

| Spot       | Th/U | Isotope ratios                    |            |                                  |            | Ages                             |            |                                   |            |                                  |            |                                  |            | Concordance |
|------------|------|-----------------------------------|------------|----------------------------------|------------|----------------------------------|------------|-----------------------------------|------------|----------------------------------|------------|----------------------------------|------------|-------------|
|            |      | $^{207}\text{Pb}/^{206}\text{Pb}$ | 1 $\sigma$ | $^{207}\text{Pb}/^{235}\text{U}$ | 1 $\sigma$ | $^{206}\text{Pb}/^{238}\text{U}$ | 1 $\sigma$ | $^{207}\text{Pb}/^{206}\text{Pb}$ | 1 $\sigma$ | $^{207}\text{Pb}/^{235}\text{U}$ | 1 $\sigma$ | $^{206}\text{Pb}/^{238}\text{U}$ | 1 $\sigma$ |             |
| 19BK-42-48 | 0.44 | 0.06381                           | 0.00213    | 1.2635                           | 0.02737    | 0.14357                          | 0.00241    | 735                               | 69         | 830                              | 12         | 865                              | 14         | 96          |
| NIST610    | 0.99 | 0.89562                           | 0.02702    | 24.2674                          | 0.40163    | 0.19647                          | 0.00325    | 5082                              | 42         | 3279                             | 16         | 1156                             | 18         | 440         |
| 91500      | 0.36 | 0.07637                           | 0.00296    | 1.8858                           | 0.05513    | 0.17905                          | 0.00327    | 1105                              | 76         | 1076                             | 19         | 1062                             | 18         | 104         |
| GJ-1       | 0.07 | 0.05919                           | 0.00218    | 0.7879                           | 0.02089    | 0.09652                          | 0.00167    | 574                               | 78         | 590                              | 12         | 594                              | 10         | 99          |
| 19BK-42-49 | 1.43 | 0.06717                           | 0.00268    | 1.2057                           | 0.03681    | 0.13017                          | 0.00235    | 843                               | 81         | 803                              | 17         | 789                              | 13         | 102         |
| 19BK-42-50 | 1.34 | 0.15664                           | 0.00552    | 3.2411                           | 0.07866    | 0.15004                          | 0.00280    | 2420                              | 59         | 1467                             | 19         | 901                              | 16         | 163         |
| 19BK-42-51 | 0.59 | 0.06584                           | 0.00262    | 1.2643                           | 0.03865    | 0.13924                          | 0.00252    | 801                               | 81         | 830                              | 17         | 840                              | 14         | 99          |
| 19BK-42-52 | 1.03 | 0.06724                           | 0.00209    | 1.175                            | 0.02141    | 0.12670                          | 0.00209    | 845                               | 63         | 789                              | 10         | 769                              | 12         | 103         |
| 19BK-42-53 | 0.93 | 0.06338                           | 0.00239    | 1.0991                           | 0.03060    | 0.12576                          | 0.00221    | 721                               | 78         | 753                              | 15         | 764                              | 13         | 99          |
| 19BK-42-54 | 2.15 | 0.06760                           | 0.00271    | 1.2272                           | 0.03790    | 0.13165                          | 0.00239    | 856                               | 81         | 813                              | 17         | 797                              | 14         | 102         |
| 91500      | 0.36 | 0.07477                           | 0.00287    | 1.8452                           | 0.05308    | 0.17896                          | 0.00325    | 1062                              | 75         | 1062                             | 19         | 1061                             | 18         | 100         |
| 19BK-42-55 | 0.64 | 0.06313                           | 0.00239    | 1.0747                           | 0.03015    | 0.12346                          | 0.00218    | 713                               | 78         | 741                              | 15         | 751                              | 12         | 99          |
| 19BK-42-56 | 0.64 | 0.06541                           | 0.00266    | 1.2353                           | 0.03909    | 0.13696                          | 0.00251    | 788                               | 83         | 817                              | 18         | 827                              | 14         | 99          |
| 19BK-42-57 | 1.39 | 0.06516                           | 0.00249    | 1.1000                           | 0.03146    | 0.12242                          | 0.00218    | 780                               | 78         | 753                              | 15         | 745                              | 13         | 101         |
| 19BK-42-58 | 2.08 | 0.07000                           | 0.00371    | 1.208                            | 0.05561    | 0.12511                          | 0.00265    | 928                               | 105        | 804                              | 26         | 760                              | 15         | 106         |
| 19BK-42-59 | 1.25 | 0.06464                           | 0.00224    | 1.2349                           | 0.02945    | 0.13855                          | 0.00238    | 763                               | 71         | 817                              | 13         | 836                              | 13         | 98          |
| 19BK-42-60 | 0.90 | 0.06560                           | 0.00353    | 1.1518                           | 0.05426    | 0.12734                          | 0.00263    | 794                               | 109        | 778                              | 26         | 773                              | 15         | 101         |
| NIST610    | 0.98 | 0.89439                           | 0.02685    | 24.8381                          | 0.41208    | 0.20142                          | 0.00335    | 5080                              | 42         | 3302                             | 16         | 1183                             | 18         | 429         |
| 91500      | 0.36 | 0.07394                           | 0.00297    | 1.8243                           | 0.05699    | 0.17894                          | 0.00334    | 1040                              | 79         | 1054                             | 20         | 1061                             | 18         | 98          |
| GJ-1       | 0.07 | 0.05865                           | 0.00214    | 0.7998                           | 0.02111    | 0.09891                          | 0.00172    | 554                               | 78         | 597                              | 12         | 608                              | 10         | 98          |
| 19BK-42-61 | 1.10 | 0.06599                           | 0.00325    | 1.1539                           | 0.04828    | 0.12682                          | 0.00253    | 806                               | 100        | 779                              | 23         | 770                              | 14         | 101         |
| 19BK-42-62 | 0.69 | 0.06569                           | 0.00474    | 1.1302                           | 0.07533    | 0.12479                          | 0.00316    | 796                               | 144        | 768                              | 36         | 758                              | 18         | 101         |
| 19BK-42-63 | 1.28 | 0.06410                           | 0.00281    | 1.1027                           | 0.03934    | 0.12477                          | 0.00236    | 745                               | 90         | 755                              | 19         | 758                              | 14         | 100         |
| 19BK-42-64 | 0.85 | 0.06436                           | 0.00244    | 1.0659                           | 0.03011    | 0.12014                          | 0.00214    | 753                               | 78         | 737                              | 15         | 731                              | 12         | 101         |
| 19BK-42-65 | 1.25 | 0.06525                           | 0.00243    | 1.1207                           | 0.03061    | 0.12458                          | 0.00220    | 782                               | 76         | 763                              | 15         | 757                              | 13         | 101         |
| 19BK-42-66 | 0.88 | 0.06393                           | 0.00325    | 1.1189                           | 0.04905    | 0.12696                          | 0.00253    | 739                               | 104        | 762                              | 24         | 771                              | 14         | 99          |
| 91500      | 0.36 | 0.07466                           | 0.00282    | 1.8445                           | 0.05210    | 0.17920                          | 0.00326    | 1059                              | 75         | 1062                             | 19         | 1063                             | 18         | 100         |
| 19BK-42-67 | 1.26 | 0.06411                           | 0.00292    | 1.0997                           | 0.04138    | 0.12444                          | 0.00239    | 745                               | 93         | 753                              | 20         | 756                              | 14         | 100         |
| 19BK-42-68 | 1.12 | 0.06605                           | 0.00290    | 1.1795                           | 0.04212    | 0.12954                          | 0.00245    | 808                               | 89         | 791                              | 20         | 785                              | 14         | 101         |
| 19BK-42-69 | 0.78 | 0.06292                           | 0.00303    | 1.1254                           | 0.04580    | 0.12975                          | 0.00254    | 706                               | 99         | 766                              | 22         | 786                              | 14         | 97          |
| 19BK-42-70 | 0.92 | 0.06467                           | 0.00220    | 1.1519                           | 0.02670    | 0.12921                          | 0.00222    | 764                               | 70         | 778                              | 13         | 783                              | 13         | 99          |
| 19BK-42-71 | 1.43 | 0.06454                           | 0.00307    | 1.1496                           | 0.04609    | 0.12923                          | 0.00252    | 759                               | 97         | 777                              | 22         | 784                              | 14         | 99          |

| Spot       | Th/U | Isotope ratios                    |            |                                  |            | Ages                             |            |                                   |            |                                  |            |                                  |            | Concordance |
|------------|------|-----------------------------------|------------|----------------------------------|------------|----------------------------------|------------|-----------------------------------|------------|----------------------------------|------------|----------------------------------|------------|-------------|
|            |      | $^{207}\text{Pb}/^{206}\text{Pb}$ | 1 $\sigma$ | $^{207}\text{Pb}/^{235}\text{U}$ | 1 $\sigma$ | $^{206}\text{Pb}/^{238}\text{U}$ | 1 $\sigma$ | $^{207}\text{Pb}/^{206}\text{Pb}$ | 1 $\sigma$ | $^{207}\text{Pb}/^{235}\text{U}$ | 1 $\sigma$ | $^{206}\text{Pb}/^{238}\text{U}$ | 1 $\sigma$ |             |
| 19BK-42-72 | 0.85 | 0.07464                           | 0.00324    | 1.1486                           | 0.04033    | 0.11164                          | 0.00215    | 1058                              | 85         | 777                              | 19         | 682                              | 12         | 114         |
| NIST610    | 0.99 | 0.88802                           | 0.02653    | 24.5278                          | 0.40799    | 0.20039                          | 0.00336    | 5070                              | 42         | 3290                             | 16         | 1177                             | 18         | 431         |
| 91500      | 0.37 | 0.07580                           | 0.00289    | 1.8732                           | 0.05382    | 0.17928                          | 0.00330    | 1090                              | 75         | 1072                             | 19         | 1063                             | 18         | 103         |
| GJ-1       | 0.06 | 0.05750                           | 0.00210    | 0.7844                           | 0.02089    | 0.09898                          | 0.00173    | 510                               | 79         | 588                              | 12         | 608                              | 10         | 97          |
| 19BK-42-73 | 1.20 | 0.06489                           | 0.00509    | 1.1303                           | 0.08290    | 0.12637                          | 0.00342    | 771                               | 157        | 768                              | 40         | 767                              | 20         | 100         |
| 19BK-42-74 | 0.82 | 0.06588                           | 0.00214    | 1.2880                           | 0.02704    | 0.14187                          | 0.00241    | 802                               | 67         | 840                              | 12         | 855                              | 14         | 98          |
| 19BK-42-75 | 1.53 | 0.06251                           | 0.00244    | 1.0964                           | 0.03287    | 0.12727                          | 0.00230    | 692                               | 81         | 752                              | 16         | 772                              | 13         | 97          |
| 19BK-42-76 | 0.42 | 0.06328                           | 0.00244    | 1.2068                           | 0.03525    | 0.13838                          | 0.00250    | 718                               | 80         | 804                              | 16         | 836                              | 14         | 96          |
| 19BK-42-77 | 1.36 | 0.06189                           | 0.00269    | 1.0467                           | 0.03698    | 0.12272                          | 0.00231    | 670                               | 90         | 727                              | 18         | 746                              | 13         | 97          |
| 19BK-42-78 | 0.80 | 0.06585                           | 0.00233    | 1.2571                           | 0.03157    | 0.13853                          | 0.00243    | 802                               | 72         | 827                              | 14         | 836                              | 14         | 99          |
| 91500      | 0.36 | 0.07185                           | 0.00290    | 1.7774                           | 0.05622    | 0.17953                          | 0.00339    | 982                               | 80         | 1037                             | 21         | 1064                             | 19         | 92          |
| 19BK-42-79 | 0.63 | 0.07199                           | 0.00265    | 1.4784                           | 0.04011    | 0.14902                          | 0.00268    | 986                               | 73         | 922                              | 16         | 896                              | 15         | 103         |
| 19BK-42-80 | 1.41 | 0.06207                           | 0.00240    | 1.0434                           | 0.03069    | 0.12199                          | 0.00220    | 677                               | 81         | 726                              | 15         | 742                              | 13         | 98          |
| 19BK-42-81 | 1.06 | 0.06552                           | 0.00324    | 1.1512                           | 0.04873    | 0.12751                          | 0.00256    | 791                               | 101        | 778                              | 23         | 774                              | 15         | 101         |
| 19BK-42-82 | 1.99 | 0.06474                           | 0.00252    | 1.041                            | 0.03098    | 0.11666                          | 0.00212    | 766                               | 80         | 724                              | 15         | 711                              | 12         | 102         |
| 19BK-42-83 | 2.03 | 0.06912                           | 0.00279    | 1.2576                           | 0.03985    | 0.13206                          | 0.00246    | 902                               | 81         | 827                              | 18         | 800                              | 14         | 103         |
| 19BK-42-84 | 0.88 | 0.06780                           | 0.00311    | 1.370                            | 0.05237    | 0.14665                          | 0.00289    | 863                               | 92         | 876                              | 22         | 882                              | 16         | 99          |
| NIST610    | 0.99 | 0.88146                           | 0.02620    | 24.660                           | 0.41089    | 0.20306                          | 0.00343    | 5059                              | 41         | 3295                             | 16         | 1192                             | 18         | 425         |
| 91500      | 0.35 | 0.08396                           | 0.00320    | 2.073                            | 0.06000    | 0.17920                          | 0.00334    | 1292                              | 73         | 1140                             | 20         | 1063                             | 18         | 122         |
| GJ-1       | 0.07 | 0.06002                           | 0.00218    | 0.834                            | 0.02201    | 0.10090                          | 0.00178    | 604                               | 77         | 616                              | 12         | 620                              | 10         | 99          |
| 19BK-42-85 | 1.05 | 0.06309                           | 0.00386    | 1.04696                          | 0.05773    | 0.12045                          | 0.00273    | 711                               | 125        | 727                              | 29         | 733                              | 16         | 99          |
| 19BK-42-86 | 1.59 | 0.06858                           | 0.00239    | 1.29340                          | 0.03172    | 0.13689                          | 0.00241    | 886                               | 70         | 843                              | 14         | 827                              | 14         | 102         |
| 19BK-42-87 | 1.03 | 0.07586                           | 0.00277    | 1.40765                          | 0.03765    | 0.13470                          | 0.00243    | 1091                              | 71         | 892                              | 16         | 815                              | 14         | 110         |
| 19BK-42-88 | 1.46 | 0.06336                           | 0.00230    | 1.12877                          | 0.03002    | 0.12933                          | 0.00230    | 720                               | 75         | 767                              | 14         | 784                              | 13         | 98          |
| 19BK-42-89 | 1.29 | 0.06772                           | 0.00244    | 1.23011                          | 0.03224    | 0.13186                          | 0.00235    | 860                               | 73         | 814                              | 15         | 799                              | 13         | 102         |
| 19BK-42-90 | 1.40 | 0.06186                           | 0.00281    | 1.06964                          | 0.04038    | 0.12553                          | 0.00243    | 669                               | 94         | 739                              | 20         | 762                              | 14         | 97          |
| NIST610    | 0.99 | 0.88024                           | 0.02609    | 24.48128                         | 0.40830    | 0.20192                          | 0.00342    | 5058                              | 41         | 3288                             | 16         | 1186                             | 18         | 427         |
| 91500      | 0.36 | 0.07271                           | 0.00280    | 1.79674                          | 0.05292    | 0.17942                          | 0.00333    | 1006                              | 76         | 1044                             | 19         | 1064                             | 18         | 95          |
| GJ-1       | 0.07 | 0.06130                           | 0.00219    | 0.85347                          | 0.02206    | 0.10109                          | 0.00178    | 650                               | 75         | 627                              | 12         | 621                              | 10         | 101         |
